# Supplementary material for: Reduced expression of phosphatase PTPN2 promotes pathogenic conversion of Tregs in autoimmunity
Source: JCI journal article supplement (doi:10.1172/jci123267), 2019-01-08

## **Supplemental Material**

### **Reduced expression of phosphatase PTPN2 promotes pathogenic conversion of Tregs in autoimmunity**

Mattias N.D. Svensson, Karen M. Doody, Benjamin J. Schmiedel, Sourya Bhattacharyya, Bharat Panwar, Florian Wiede, Shen Yang, Eugenio Santelli, Dennis J. Wu, Cristiano Sacchetti, Ravindra Gujar, Gregory Seumois, William B. Kiosses, Isabelle Aubry, Gisen Kim, Piotr Mydel, Shimon Sakaguchi, Mitchell Kronenberg, Tony Tiganis, Michel L. Tremblay, Ferhat Ay, Pandurangan Vijayanand and Nunzio Bottini\*

\*Corresponding author: Nunzio Bottini, MD, PhD, Department of Medicine, University of California San Diego ACTRI, 9452 Medical Center Dr., La Jolla, CA 92037, Phone: +1 (858) 246-2398, Email: nbottini@ucsd.edu

## **Supplemental material and methods**

### **Mice**

Generation of *Ptpn2*<sup>fl<sup>ox</sup>ed</sup> B6 mice has recently been described(1). Briefly, the targeting construct included two LoxP sites flanking exon 6, an IRES dependent Cerulean cassette and a neomycin resistance cassette, both of which are flanked by FRT sites. R1 ES cells were electroporated and correctly targeted clones were injected in B6 blastocysts. Chimeric mice were mated with B6 mice and subsequently backcrossed for eight generations to the B6 background. *Ptpn2*<sup>fl<sup>ox</sup>ed</sup> B6 were used at 6-8 weeks of age for further breeding with Cre mice unless otherwise noted.

BALB/c IFN $\gamma$ -KO (JAX# 002286, C.129S7(B6)-*Ifng*<sup>tm1Ts</sup>/J(2)) mice were obtained from Jackson laboratories and bred with SKG mice.

### **Animal models of arthritis**

For the Collagen Antibody-Induced Arthritis model (CAIA), 8-week-old male BALB/c mice were injected with 2 mg of anti-collagen antibody cocktail i.p. (ArthritoMab™, MD Bioscience). After 3 days, mice were injected with 100 ug LPS i.p. (MD Bioscience) to boost induction of arthritis. Assessment of arthritis was performed as for the K/BxN serum transfer model.

For B cell depletion experiments, female SKG mice were injected with anti-mouse CD20 (100  $\mu$ g) or isotype control (MOPC21) obtained from Biogen Idec, USA. Mice were treated by retro-orbital injection once a week starting 14 days after mannan injection. Mice were injected with mannan at 8 weeks of age.

All arthritis studies were performed on littermate mice. For B cell depleting mice with similar degree of arthritis was treated with either B cell depleting or control antibodies. Clinical scoring of mice was performed in a blinded manner in which treatments were blinded to the researcher during scoring.

### **Assessment of inflammation with an intravital probe**

The Xenolight Rediject Inflammation Probe (PerkinElmer) is an intravital luminescent dye that penetrates phagocytic cells and enables intravital assessment of joint inflammation. 3 days after K/BxN serum-induced arthritis induction, the probe was administered to mice by i.p. injection according to the manufacturer's instructions. Joint

inflammation was quantified using a Xenogen IVIS Spectrum in vivo imaging system (PerkinElmer).

### **Histological assessment of arthritic joints**

Hind paws were fixed in 10% neutral-buffered formalin, decalcified, and embedded in paraffin. Sections were prepared from tissue blocks by HistoTox (Boulder, CO) and stained with H&E and safranin-O/Fast Green/Hematoxylin (Sigma-Aldrich). Histopathological scoring for inflammation, bone erosion, and cartilage erosion was performed in a blinded manner as previously described(3). Scoring of synovial inflammation, bone destruction and cartilage depletion was performed in a blinded manner by two independent researchers.

### **Micro-CT**

Ankles were placed in 10% neutral-buffered formalin. After fixation, samples were transferred to 70% ethanol. Before scanning, bones were transferred to PBS for 48 hours. Scanning was performed on a Skyscan1176 micro-CT (Bruker, Antwerp, Belgium) with a voxel size of 9  $\mu\text{m}$ , at 50 kV/ 200 mA, with a 0.5 mm aluminum filter. Exposure time was 810 ms. The X-ray projections were obtained at 0.4° intervals with a scanning angular rotation of 180° and a combination of 4 average frames. The projection images were reconstructed into 3D images using NRECON software (Bruker) and CT-Analyzer (Bruker). Images were generated using the CT-VOX software (Bruker).

### **Gene-expression analysis**

Arthritic ankles were flash frozen in liquid nitrogen and stored. RNA was isolated from arthritic ankles using TRIzol (Invitrogen) according to manufacturer's protocol.

For evaluation of gene expression in naïve ( $\text{CD4}^+\text{CD44}^+\text{CD62L}^+\text{FoxP3}^-\text{eGFP}^-$ ), effector/memory ( $\text{CD4}^+\text{CD44}^{\text{hi}}\text{CD62L}^-\text{FoxP3}^-\text{eGFP}^-$ ) and Tregs ( $\text{CD4}^+\text{FoxP3}^+\text{eGFP}^-$ ), cells were sorted using flow cytometry from pre-arthritic (8-week-old) *Pttn2*<sup>+/-</sup> and *Pttn2*<sup>+/-</sup> male  $\text{FoxP3}^{\text{eGFP}}$  SKG mice. After sorting cells were lysed in RLT buffer and RNA was isolated using the RNeasy Micro Kit (Qiagen) according to manufacturer's protocol. cDNA was synthesized using the SuperScript® III RT Kit (Thermo Fisher), according to the manufacturer's instructions. Primer assays used for *Il17a* (PPM03023A), *Tnf* (PPM03113G), *Blimp1/Prdm1* (PPM25183F), *Cxcl12* (PPM02965E), *Cxcl13* (PPM02947G), *Lta* (PPM03114A), *Ltb* (PPM03119A), *Bcl6* (PPM04965C), *Il1b*

(PPM03109F), *Il6* (PPM03015A), *Rankl/Tnfsf11* (PPM03047F), *gp130/Il6st* (PPM03123C), *Il6ra* (PPM03027F), *Ptpn2* (PPM35755C), *Il21* (PPM03761F), *Foxp3* (PPM05497F), *Rorc* (PPM25095A) and *Gapdh* (PPM02946E) were obtained from Qiagen. *Gapdh* was used as reference gene and the results are presented as a fold change compared to either the expression level in *Ptpn2*<sup>+/+</sup> SKG BALB/c samples with the  $\Delta\Delta Cq$  method or as fold change compared to the expression of *Gapdh*.

### **Immunofluorescent staining of whole mounts of ankle tissue samples**

For visualization of ectopic lymphoid structures (ELS) in arthritic ankles, whole mounts of synovial tissue samples isolated from arthritic ankles of male *Ptpn2*<sup>+/+</sup> and *Ptpn2*<sup>+/-</sup> SKG BALB/c mice 30 days after mannan injection were fixed overnight in 4% PFA at room temp. After fixation samples were transferred into a buffer containing 2% FBS, 0.5% Saponin and 0.1% Sodium Azide in PBS. Pieces of synovial tissue was removed from fixed ankles and stained over night with antibodies directed against CD4 (RM4-5, eBioscience) and B220 (RA3-6B2, eBioscience) in the buffer mentioned above. Nuclear staining was performed with Hoechst and samples were mounted using ProLong Gold Antifade (Thermo Scientific). Z stacks of multipanelled images created from the whole mounted samples were captured using a 60x objective (using a 0.5 micron step size) on an Olympus FluoView FV10i laser scanning confocal microscope. Each panel of images were obtained at a 10% overlap between sequential image tiles and then stitched together as a multi-panel mega image using the FluoView-ASW version 4.2 software (Olympus, Inc.). The Mega images were further processed as maximum intensity projections for presentation in figure panels.

### **Cell preparation and flow cytometry**

Single-cell suspensions were prepared from lymph nodes, spleen and thymus. For isolation of synovial cells, joints were collected and bone marrow cells were flushed out. Joints were rinsed with PBS and dissociated with Liberase TM (Roche) at 37°C. Cells were pre-incubated with Fc block (BD Pharmingen) before antibody staining. For surface staining, fluorophore-conjugated antibodies specific for CD4 (RM4-5), CD8 (53-6.7), TCR $\beta$  (H57-597), CD19 (ID3), CD45.2 (30F11), CD45.1 (A20), CD25 (PC65.1), CD69 (H1.2F3), CD5 (53-7.3), CD62L (MEL-14), ICOS (7E.17G9) and CD44 (IM7) were obtained from eBioscience/Thermo Fisher. CCR6 (140706) and Mouse V $\beta$  TCR

screening panel (catalog 557004) was obtained from BD Bioscience. For intracellular cytokine staining, cells were incubated with 20 ng/mL Phorbol 12-myristate 13-acetate (PMA, Sigma Aldrich) and 1  $\mu$ m Ionomycin (Sigma Aldrich) in the presence of Brefeldin A (1:1000 dilution, eBioscience/Thermo Fisher) for 5h at 37°. Intracellular staining was performed with the IC fixation buffer (eBioscience/Thermo Fisher) and permeabilization buffer (eBioscience/Thermo Fisher). For intracellular staining of transcription factors the FoxP3/Transcription Factor staining buffer set was used (eBioscience/Thermo Fisher). Antibodies recognizing FoxP3 (FJK-16s), ROR $\gamma$ t (B2D), IL-17A (eBio17B7), IFN $\gamma$  (XMG1.2), IL-6 (MP5-20F3) and TNF $\alpha$  (MP6-XT22) were obtained from eBioscience/Thermo Fisher. Dead cells were excluded from analysis by staining with Fixable Viability dye from eBioscience/Thermo Fisher.

For staining of phosphorylated proteins, stimulated cells were fixed by adding pre-warmed IC fixation buffer in a ratio of 1:1 and incubating at 37°C. Cells were permeabilized using ice-cold methanol and stained with antibodies directed against phosphorylated STAT3 (pY705; clone 4/P-STAT3) STAT1 (pY701; clone 4a) and STAT5 (pY694; clone 47/STAT5(pY694)) obtained from BD Bioscience.

Cells were analyzed on a BD LSR II, BD Fortessa, BD FACS Canto II (BD Biosciences) or a Bio-Rad ZE5 Cell Analyzer. Flow cytometry data was analyzed using FlowJo software (Tree Star, Inc.). Gating of cells was based on isotype control and fluorochrome minus one (FMO) staining when needed.

### **Cell preparation for phosflow**

For evaluation of phosphorylation of STAT3 by phosflow, effector Tregs (CD44<sup>hi</sup>CD62L<sup>-</sup>, Supplemental Figure 8B) were sorted by flow cytometry from *Pttn2*<sup>+/+</sup> and *Pttn2*<sup>+/-</sup> 8-week-old female FoxP3<sup>eGFP</sup> SKG BALB/c mice. After sorting, cells were rested for 3h at 37°C and then stimulated with IL-6 (Biolegend, 5 ng/mL) for 15 minutes. Cells were fixed and stained as described above.

For evaluation of phosphorylation of STAT1 by phosflow, CD4 T cells were isolated from *Pttn2*<sup>+/+</sup> and *Pttn2*<sup>+/-</sup> 8-week-old male SKG BALB/c mice using the EasySep™ Mouse CD4 T Cell Enrichment Kit (Stem Cell Technologies). After isolation, cells were rested for 3h at 37°C and then stimulated with INF $\gamma$  (eBioscience, 5 and 50 ng/mL) for 15 minutes. Cells were fixed and stained as described above.

For evaluation of phosphorylation of STAT5 by phosflow, naïve CD4 T cells were isolated from *Ptpn2<sup>+/+</sup>* and *Ptpn2<sup>+/-</sup>* 8-week-old male SKG BALB/c mice using the EasySep™ Mouse Naïve CD4 T Cell Isolation Kit (StemCell Technologies). To induce expression of CD25, cells were stimulated with plate bound anti-CD3 (2 ug/mL) and anti-CD28 (1 ug/mL) for 24h. After 24 h cells were washed and rested for 2h and then stimulated with IL-2 (R&D systems, 0.2 and 2 ng/mL) for 15 and 60 minutes. Cells were fixed and stained as described above.

### **In vitro Th differentiation**

Naïve CD4 T cells were isolated from spleen and lymph nodes from *Ptpn2<sup>+/-</sup>* and *Ptpn2<sup>+/+</sup>* 8-week-old male SKG mice using the EasySep™ Mouse Naïve CD4 T Cell Isolation Kit (StemCell Technologies) and cultured under Th1 or Th17 polarizing conditions.

For differentiation of Th1 cells, naïve CD4 T cells were primed overnight with plate bound anti-CD3 (145-2C11, Biolegend, 2 µg/ml), soluble anti-CD28 (37.51, Biolegend, 0.5 µg/mL), anti-IL4 (11B11, Biolegend, 10 µg/mL) and recombinant IL-12 (R&D Systems, 25 ng/mL). After 24 hours, primed cells were re-stimulated with plate-bound anti-CD3 (2 µg/mL), anti-IL4 (10 µg/mL), IL-12 (25 ng/mL) and IL-2 (10 ng/mL) for 72h. After another 72h, cells were again re-stimulated with plate-bound anti-CD3 (2 µg/mL), anti-IL4 (10 µg/mL), IL-12 (25 ng/mL) and IL-2 (10 ng/mL) for 72h. To verify Th1 differentiation cells were stimulated with PMA (20 ng/mL) and ionomycin (1 µM) in the presence of Brefeldin A for 4h and analyzed by flow cytometry for expression of IFN $\gamma$ .

For Th17 differentiation, naïve CD4 T cells were primed overnight with plate-bound anti-CD3 (2 µg/mL), soluble anti-CD28 (1 µg/mL), anti-IFN $\gamma$  (XMG1.2, 10 µg/mL), anti-IL-4 (10 µg/mL), rhTGF $\beta$ 1 (R&D Systems, 5 ng/mL) and IL-6 (Biolegend, 1 or 10 ng/mL). After priming, cells were restimulated with plate bound anti-CD3 (2 µg/mL), rhTGF $\beta$ 1 (5 ng/mL) and IL-6 (1 or 10 ng/mL) for 72h. After 72h the cells were re-stimulated with plate bound anti-CD3 (2 µg/mL), rhTGF $\beta$ 1 (5 ng/mL) and IL-6 (1, or 10 ng/mL) for 72h. To verify Th17 differentiation cells were stimulated with PMA (20 ng/mL) and ionomycin (1 µM) in the presence of Brefeldin A for 4h and analyzed by flow cytometry for expression of IL-17A.

## **In vitro upregulation of CD25 and CD69 in response to TCR stimulation**

Naïve CD4 T cells were isolated from pooled spleen and lymph nodes of *Pttn2*<sup>+/+</sup> and *Pttn2*<sup>+/-</sup> male SKG BALB/c mice using the EasySep™ Mouse Naïve CD4 T Cell Isolation Kit (StemCell Technologies). Isolated cells were stimulated with varying concentrations of plate bound anti-CD3 together with soluble anti-CD28 (0.5 µg/mL) for different time points. Expression of CD69 and CD25 was evaluated by flow cytometry.

## **Treg suppression assay in vitro**

Tregs (CD4<sup>+</sup>FoxP3<sup>eGFP+</sup>) were flow-sorted from spleen and lymph nodes of *Pttn2*<sup>+/+</sup> and *Pttn2*<sup>+/-</sup> 8-week-old female FoxP3<sup>eGFP</sup> SKG BALB/c mice, whereas naïve CD4 T cells (CD4<sup>+</sup>CD62L<sup>+</sup>CD44<sup>low</sup>CD25<sup>-</sup>) were sorted from spleen of female *Pttn2*<sup>+/+</sup> BALB/c mice. Naïve CD4 T cells were stained with CellTrace Violet (Invitrogen) to track proliferation. 5x10<sup>4</sup> naïve T cells were plated together with varying numbers of Tregs. T cells were stimulated with 5 µg/mL of anti-CD3 (Biolegend) and 10x10<sup>4</sup> irradiated splenocytes (3,500 rad) from female Rag2-KO mice as APCs. Cells were stimulated for 4 days after which proliferation and expression of CD25 on naïve CD4 T cells was evaluated by flow cytometry.

## **RNA-sequencing**

RNA from sorted IL-17<sup>+</sup> exTregs and Tregs was prepared using miRNeasy micro kit (Qiagen) and quantified as described previously(4, 5). RNA-Sequencing was performed as previously described. Briefly, 5 ng of purified total RNA was used for poly(A) mRNA selection(6). Purified total RNA (5 ng) was amplified following the Smart-seq2 protocol and amplified cDNA purified with AMPure XP beads (1:1 ratio; Beckman Coulter). 1 ng of cDNA was used for library preparation with using Nextera XT DNA sample preparation kit and index kit (Illumina, catalog# FC-131-1096). Samples were sequenced using a HiSeq2500 (Illumina) to obtain 50-bp single end reads. To reduce assay-to-assay variability, both whole transcriptome amplification and sequencing library preparations were performed in a 96-well format. Quality control steps were included to determine total RNA quality and quantity, the optimal number of PCR pre-amplification cycles, and fragment size selection (Bioanalyzer, Agilent), samples that failed quality control were eliminated from further downstream steps. Barcoded Illumina sequencing libraries were generated utilizing an ancillary automated platform (Biomek Fxp, Beckman

Coulter). Libraries were sequenced on the HiSeq2500 Illumina platform to obtain 50-bp single-end reads (HiSeq SBS and SR Cluster v4 kits, Illumine catalog# FC-401-4002 and GD-401-4001, respectively), generating an average of 11.4 million mapped reads / sample.

### **RNA-sequencing analysis**

RNA-seq data were mapped against the separate mm10 reference genomes for C57BL\_6J and BALB\_cJ mice strains using TopHat (v2.0.9 (--max-multihits 1 --microexon-search --bowtie1) and the gene annotations downloaded from the Ensembl website. Trimmomatic (0.36) was used to remove adapters. The alignment results were parsed via the SAMtools to generate SAM files and read counts to each genomic feature were obtained with the htseq-count -m union -s no -t exon -i gene\_name (part of the HTSeq framework, version 0.7.1). After removing absent features (zero counts in all samples), the raw counts were then imported to R/Bioconductor package DESeq2 (1.14.1) to identify differentially expressed genes among samples. The *P*-values for differential expression are calculated using binomial test for differences between the base means of two conditions. These p-values were then adjusted for multiple test correction using the Benjamini Hochberg algorithm to control the false discovery rate (FDR). We considered genes differentially expressed between two groups of samples when the DESeq2 analysis resulted in an adjusted *P*-value of <0.05 and the fold-change in gene expression > 2-fold.

### **MA-Plots, heat-maps and pathway analysis for RNA-Seq data**

The ggmaplot function of ggpubr (v0.1.6) package for plotting MA-plots. Significantly up- and down-regulated genes are highlighted in the red and blue colors, respectively. Important genes are labeled in the box and all non-significant genes are shown in grey color. The heat-maps are generated using TPM (transcripts per million) values of differentially expressed genes in Qlucore Omics Explorer 3.2 software package. The TPM values are further converted into Z-score ranges from -2 to 2 (blue-to-yellow) for visualization purpose in heat-maps.

Pathway enrichments were calculated using the Ingenuity Pathway Analysis software (Qiagen). Up-regulated and down-regulated genes (comparing exTreg with



Tregs) with an adjusted *P*-value of <0.05 and a fold-change in gene expression > 2-fold were used for pathway analysis.

### **ATAC-Sequencing**

ATAC-seq was performed according to Buenrostro *et al.*(7) with adoption of the improved Omni-ATAC protocol described by Corces *et al.*(8). Briefly, live cells were lysed to extract nuclei in Omni-ATAC lysis buffer (10mM Tris-HCl pH 7.4, 10 mM NaCl, 3 mM MgCl<sub>2</sub>, 0.1% NP-40, 0.1% Tween20 and 0.01% Digitonin). Nuclei were re-suspended in 50 µl Transposition mix (25 µl 2xTD buffer, 2.5 µL transposase [Nextera, Illumina], 16.5 µl PBS, 0.5 µl, 1% Digitonin, 0.5 µl, 10% Tween20 and 5 µl H<sub>2</sub>O) and the transposase reaction was conducted for 30 min at 37 °C. Right after tagmentation, fragments were purified by DNA precipitation and capture on columns (Zymo Research). Library amplification and barcoding were performed using Nextera DNA sample preparation kit and index kit (Illumina). Tagmented fragments were pre-amplified for 5 cycles followed by a second round of amplification based on the cell number (10 cycles for 0.5x10<sup>5</sup> cells, 9 cycles for 1.0x10<sup>5</sup> cells and 8 cycles for 1.5x10<sup>5</sup> cells). Amplified libraries were purified using 1:1.8 ratio of Ampure XP Beads. Library fragments ranging in size, between 100 to 600bp, were size selected, using Ampure XP beads (ratios 1:0.5 and 1:1.8; Beckman Coulter). Libraries were quantified by Picogreen assay (Invitrogen) and size distribution was assessed using fragment analyzer (Advance Analytics). Single-end sequencing was performed on a HiSeq 2500 (Illumina) generating in total more than 250 millions 50 bp short sequencing reads (HiSeq SBS and SR Cluster v4 kits, Illumina catalog# FC-401-4002 and GD-401-4001, respectively). Raw data from the sequencer was demultiplexed and FASTQ files were generated using bcl2fastq conversion software (Illumina).

### **ATAC-Sequencing analysis**

Single-end reads from ATAC-seq experiments were aligned to mm10 reference genome using Bowtie2 (version 2.3.3.1) (9, 10)], with parameters “-k 4 --mm -threads 8 -X 2000”. Reads corresponding to mitochondrial genome and chrY were filtered out. Uniquely mappable reads with mapping quality >= 30 were extracted using SAMtools (version 1.6)(11). Duplicate reads were removed by Picard tools MarkDuplicates (<https://broadinstitute.github.io/picard>). All reads aligning to the positive (+) strand were shifted by +4 bp, while all reads aligning to the negative (-) strand were shifted by -5 bp,

to account for the 9 bp distance between two adapters inserted by Tn5 transposase(7). Coverage tracks were normalized using “BamCoverage” from deepTools(12) with the arguments “-bs 10 --effectiveGenomeSize 2652783500 --normalizeUsing RPKM -e 200”. We used MACS2 (version 2.1.0)(13) for peak calling, with parameters: “-g mm -q 0.05 --nomodel --nolambda --keep-dup all --call-summits --shift -100 --extsize 200”. The summits of all peak were extended to regions with a uniform size of 500 bp. All of these uniform sized peaks were then merged to a global set of peaks, using bedtools merge routine(14). The number of transposase insertions for each of these uniform regions were computed with respect to individual samples, and normalized by their respective read counts(15). Differential ATAC-seq analysis was performed using DESeq2(16), and differentially accessible regions were filtered by FDR adjusted p-value of less than 0.05 and an estimated fold-change of at least 2. We used HOMER(17) to identify motifs for transcription factor binding sites enriched in different groups of peaks/regions. Motifs are declared as *significantly enriched* if the log p-value was less than -35, coverage above 10% and showed a fold increase of 2.5 over background coverage. Heat-map of -log p-values was generated by using Morpheus software (<http://software.broadinstitute.org/morpheus>). Heat maps show enrichment of transcription factors motifs in peaks enriched for a specific sample after pairwise comparison of Tregs 24h versus Tregs 48h (Treg 48h), Tregs 48h versus Tregs 72h (Treg 72h) and Tregs 72h versus exTregs 72h (exTreg 72h).

### **Analyses of DHS and overlap with RA-associated SNPs in *PTPN2* locus**

In silico analysis of DHS sites in the human *PTPN2* locus and overlap with RA-associated SNPs were performed as previously described(18). To define the collection of RA-linked SNPs of the human *PTPN2* haploblock, we first checked for all RA-associated SNPs from the databases of GWAS Integrator(19) and HaploReg v3(20) (in April 2016), yielding a total of 3 significant lead SNPs ( $P < 2 \times 10^{-8}$ ) in the *PTPN2* locus (rs2847297, rs1893217 and rs8083786). SNPs in tight genetic linkage ( $r^2 > 0.8$ ) were retrieved based on data from the Phase I of the 1,000 Genome Project for all available reference populations (AFR, AMR, ASN and EUR; calculations performed using HaploReg v3; see Table S1). The total number of RA-associated SNPs located in the *PTPN2* locus on chromosome 18 was 79 (lead SNPs + linked SNPs).

To determine the number of DHS in the haploblock of the *PTPN2* locus, we downloaded genomic annotations of DHS from 113 cell types (primary cell types, fetal tissues and cell lines) provided by the ENCODE Project Consortium (ENCODE Encyclopedia, version 2; <http://www.encodeproject.org>(21)) and the NIH Epigenomics Roadmap Consortium (<http://www.roadmapepigenomics.org>(22)), and generated by the labs of Stamatoyannopoulos (Stam, University of Washington) and Crawford (Duke University). We utilized processed data provided by the ENCODE project; here the Stam lab merged all DNase peak data from the Stam and Crawford labs. This merging process formed one combined DNase-seq dataset with non-overlapping DHS. The Stam lab then identified the 'master' peak in each region, defined as the peak in the region with highest peak height/z-score. Utilizing this dataset, we found a total of 268 unique DHS in the *PTPN2* locus (chr18: 12,760,001-12,900,000 [hg19]; 140 kb).

Next, to determine the average number of DHS in the locus for each cell type, we merged replicates from cell types of similar origin (see details in Table S2). Of note, merged tracks of mixed or parental populations (e.g. data sets on 'CD3 cells' or 'CD4 primary cells') were excluded when data on subsets (such as 'CD4 naïve cells', 'T<sub>H</sub>1 cells' and 'CD8 cells') were available. Our merged data set was used to determine the number of DHS within each cell type or tissue group of primary origin (shown in Figure 1B) and to identify DHS that intersect directly with RA-associated SNPs (shown in Figure 1C). The full list of merged DHS in primary cell types, including the number of single tracks for each cell type or tissue group, are provided in Table S3.

### **Immunoprecipitation and western blotting**

Resting Tregs (CD44<sup>low</sup>CD62L<sup>+</sup>) were sorted by flow cytometry (Supplemental Figure 8B) from *Ptpn2*<sup>+/+</sup> and *Ptpn2*<sup>+/-</sup> 8 week-old female FoxP3<sup>eGFP</sup> SKG BALB/c mice and expanded in vitro with anti-CD3/CD28 coated beads (Invitrogen) and IL-2 (20 ng/mL). After expansion, cells were rested for 9h in complete RPMI Media (10% FBS, 1% L-Glutamine, 1% Penicillin/Streptomycin, 1% Non-Essential amino acids, 0.1% Beta-Mercaptoethanol), after which cells were stimulated with IL-6 (50 ng/mL) for 20 minutes. Stimulated cells were lysed and sonicated in ice cold 1xTNE buffer (50 mM Tris-HCl [pH 7.4], 150 mM NaCl, 5 mM EDTA, 1% NP-40, 1 mM PMSF) containing protease and phosphatase inhibitor cocktails (Roche). Lysates were pelleted and 5% was used as

whole lysate control. Lysates were pre-cleared with protein G sepharose beads (GE healthcare) for 30 minutes at 4°C, after which beads were removed and lysates incubated over night at 4°C with an anti-STAT3 antibody (79D7, Cell Signaling). STAT3 IP were captured using protein G sepharose beads. Membranes were blotted against phosphorylated STAT3 (pTyr705, D3A7, Cell Signaling), total STAT3 (79D7, Cell Signaling), PTPN2 (6F3, MediMabs) and GAPDH (14C10, Cell Signaling).

### **Bacterial expression and purification of proteins**

Full-length human PTPN2 (amino acids 1-387) was subcloned into the NcoI-XhoI site of pET28a and expressed in *E. coli* strain BL21(DE3) as a C-terminal 6xHis tagged protein. Briefly, cultures were grown at 37°C to an OD600 of 0.7 with vigorous shaking and protein expression was induced with 0.2 mM isopropyl  $\beta$ -D-thiogalactopyranoside (IPTG) for 16-18 hours at 18°C. Following recovery from the soluble fraction of the cell lysate, the protein was purified by Nickel affinity (Ni-NTA, Qiagen) and size exclusion chromatography (ENrich™ SEC 650 10 x 300, Bio-rad), concentrated to 20 mg/ml and snap-frozen with 20 mM Tris, pH 7.3, 150 mM NaCl, 10 mM DTT as the final buffer. The substrate trapping mutant D182A, Q260A was designed on the basis of an analogous PTP1B mutant(23), generated by site-directed mutagenesis and purified the same way.

The plasmid encoding STAT3 $\beta$ (24) (a kind gift from Dr. Christoph Müller) was expressed in TKB1 (Agilent Technologies) and left unphosphorylated or phosphorylated according to the manufacturer's instructions. Untagged STAT3 $\beta$  pY705 (amino acids 127-722) was purified similar to PTPN2, except that the Nickel affinity step was replaced with ammonium phosphate precipitation as previously reported(24). Phosphorylation was confirmed by its smaller size exclusion retention volume compared to the unphosphorylated protein at similar concentrations, consistent with the formation of a dimer, and its reactivity towards an anti Phospho-STAT3 Antibody (pY705, D3A7, Cell Signaling Technology).

### **In vitro dephosphorylation assay of Stat3b**

STAT3 $\beta$  pY705 was incubated at 5 nM concentration in a buffer containing 20 mM Tris pH 7.3, 50 mM NaCl, 10 mM DTT, 0.1% Triton X-100, in the presence or absence of an equal concentration of PTPN2. Samples were taken at 0, 1h45', 3h30' and 7h for analysis on SDS-PAGE followed by Western blot (anti-STAT3 pY705, Antibody D3A7,

Cell Signaling Technology). All samples were separated on a single 4-20% polyacrylamide gel.

### **In vitro substrate trapping**

For in vitro substrate trapping, 10  $\mu$ l of Ni-NTA beads (Qiagen) loaded with 10  $\mu$ g PTPN2 substrate trapping mutant (D182A, Q260A) were incubated with 10  $\mu$ g pY705 STAT3 $\beta$  for 1 hour at 4°C and 1 hour at room temperature in total 90  $\mu$ l of a buffer containing 20 mM Tris pH 7.3, 50 mM NaCl, 1 mM DTT, 0.01% Triton X-100. Unbound protein was removed by centrifugation and washed extensively with the same buffer in a micro spin column (Pierce). Proteins were eluted with 0.5 M imidazole pH 8.0 and analyzed by SDS-PAGE. Unphosphorylated STAT3 $\beta$  was used as a negative control.

# Supplemental Figure 1

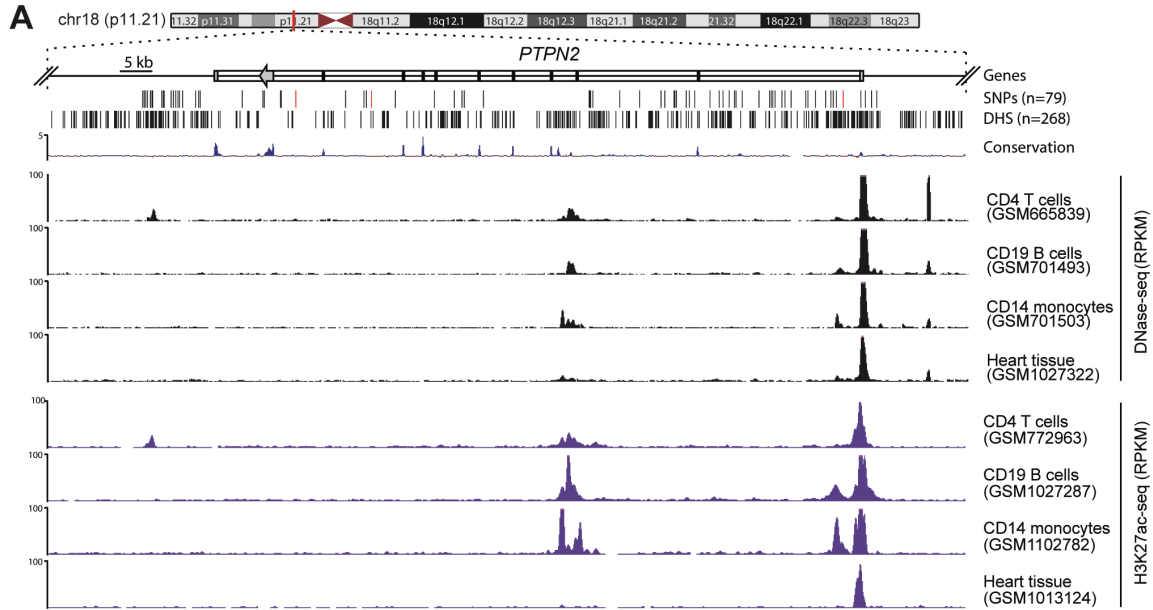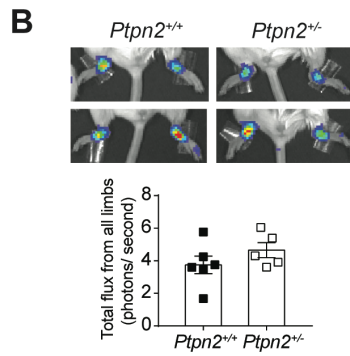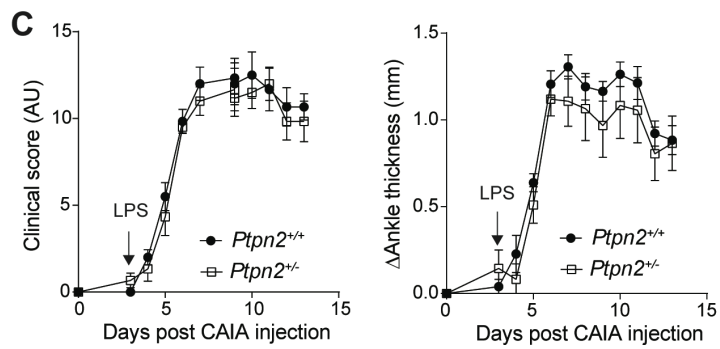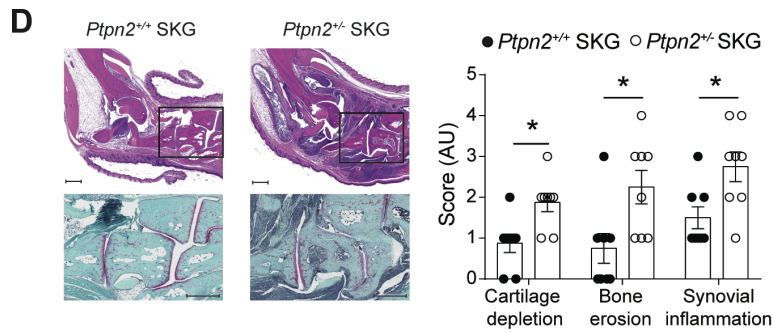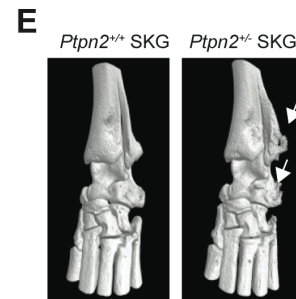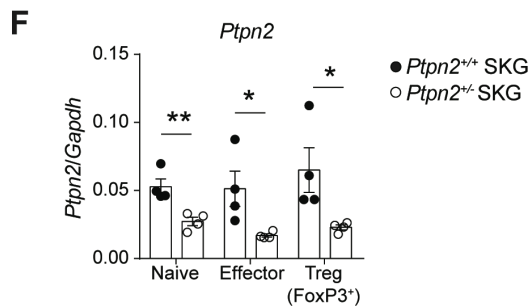

**Supplemental Figure 1. RA-associated loss-of-function mutations in *Ptpn2* promote arthritis in SKG mice.** **A)** University of California Santa Cruz (UCSC) tracks showing the chromosomal location of the human *PTPN2* gene body and locus, containing a large haplotype block of RA-associated SNPs. Black lines indicate SNPs' genomic location (the characterizing SNPs rs2847297, rs1893217 and rs8083786 are indicated in red), and DNase hypersensitivity sites (DHS) from multiple cell types obtained from the ENCODE Encyclopedia (version 2) provided by the ENCODE Project Consortium (see Methods). Exemplary tracks for DNase-I-hypersensitivity and histone modification H3K27ac in CD4 T cells, CD19 B cells, CD14 monocytes and heart tissue -provided by the ENCODE Project and NIH Epigenomics Roadmap Consortia - are shown along with UCSC multispecies conservation tracks. **B)** Ankle luminescence (*top panel*) and ankle luminescence counts (*lower panel*) of male BALB/c mice on day 3 after arthritis induction with K/BxN serum (*Ptpn2*<sup>+/+</sup> n=6; *Ptpn2*<sup>+/-</sup> n=5). **C)** Clinical scores (*left panel*) and change in ankle thickness (*right panel*) during collagen antibody-induced arthritis (CAIA) in *Ptpn2*<sup>+/+</sup> (n=6) and *Ptpn2*<sup>+/-</sup> (n=6) male BALB/c mice. **D)** Representative hematoxylin/eosin (*left upper panels*) and safranin-O (*left lower panels*) images used for histological scoring of synovial inflammation, bone erosion and cartilage depletion in arthritic ankles of 20-25 weeks old female *Ptpn2*<sup>+/+</sup> (n=8) and *Ptpn2*<sup>+/-</sup> (n=8) SKG mice. Scoring quantification is shown in *right panel*. **E)** Representative micro-CT image of arthritic ankles from female *Ptpn2*<sup>+/+</sup> and *Ptpn2*<sup>+/-</sup> SKG with spontaneous arthritis. White arrows indicate bone erosion or reactive bone deposition. **F)** Expression of *Ptpn2* in naïve (CD4<sup>+</sup>CD62L<sup>+</sup>CD44<sup>low</sup>FoxP3<sup>eGFP-</sup>), effector (CD4<sup>+</sup>CD62L<sup>-</sup>CD44<sup>hi</sup>FoxP3<sup>eGFP-</sup>) and Tregs (CD4<sup>+</sup>FoxP3<sup>eGFP+</sup>) T cells sorted from *Ptpn2*<sup>+/+</sup> (n=4) and *Ptpn2*<sup>+/-</sup> (n=4) FoxP3<sup>eGFP</sup> SKG mice. Compiled data from at least two experiments are presented in (**B-F**). Bars represent mean ± SEM. \**P* < 0.05, \*\**P* < 0.01. \*\*\**P* < 0.001 by Mann-Whitney (**D**) or unpaired t-test (**F**).

## Supplemental Figure 2

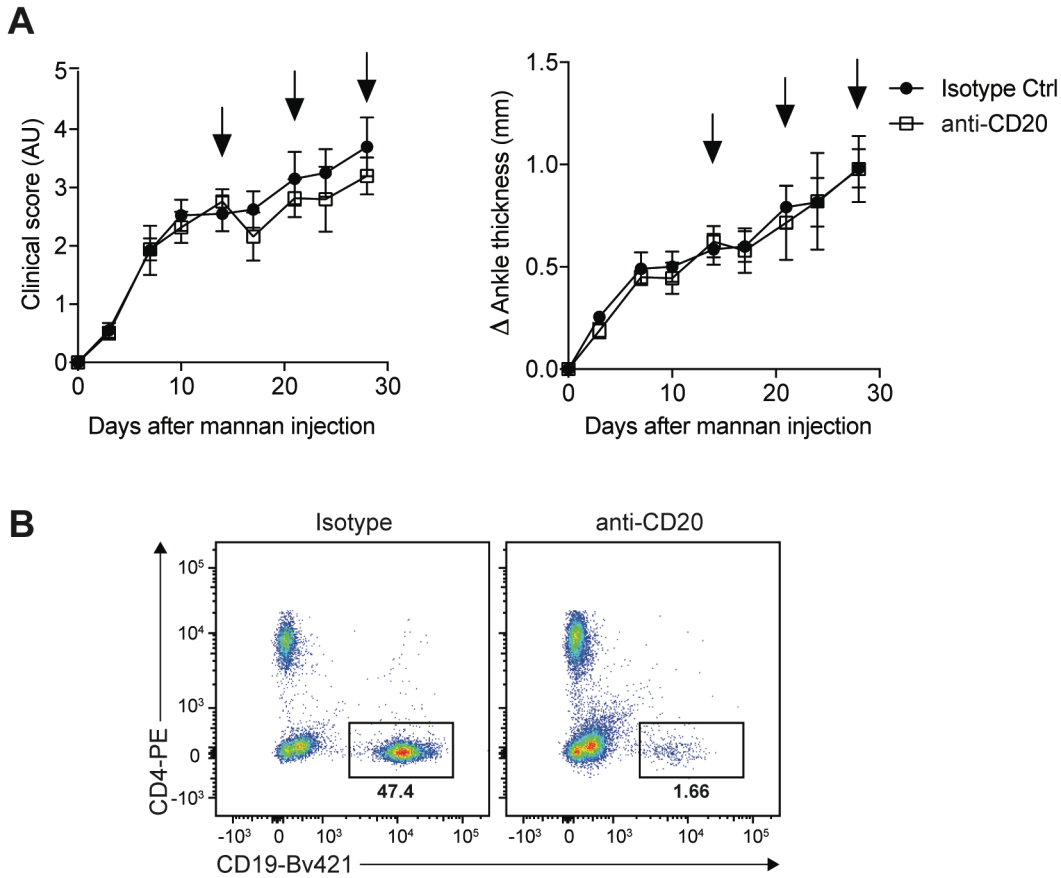

**Supplemental Figure 2. B cells do not play a significant role in the effector phase of mannan-induced arthritis in SKG mice.** Female SKG mice were treated with B cell-depleting anti-CD20 antibody (n=5) or isotype control (n=4) starting at day 14 after mannan injection (indicated by arrow). **A**) Clinical scores (*left panel*) and change in ankle thickness (*right panel*) after injection of mannan. **B**) Representative image of the frequency of CD19 B cells in peripheral blood in mice treated with either isotype or anti-CD20 antibodies. Bars represent mean  $\pm$  SEM. Compiled data from three independent experiments are presented in **(A)**.



### Supplemental Figure 3

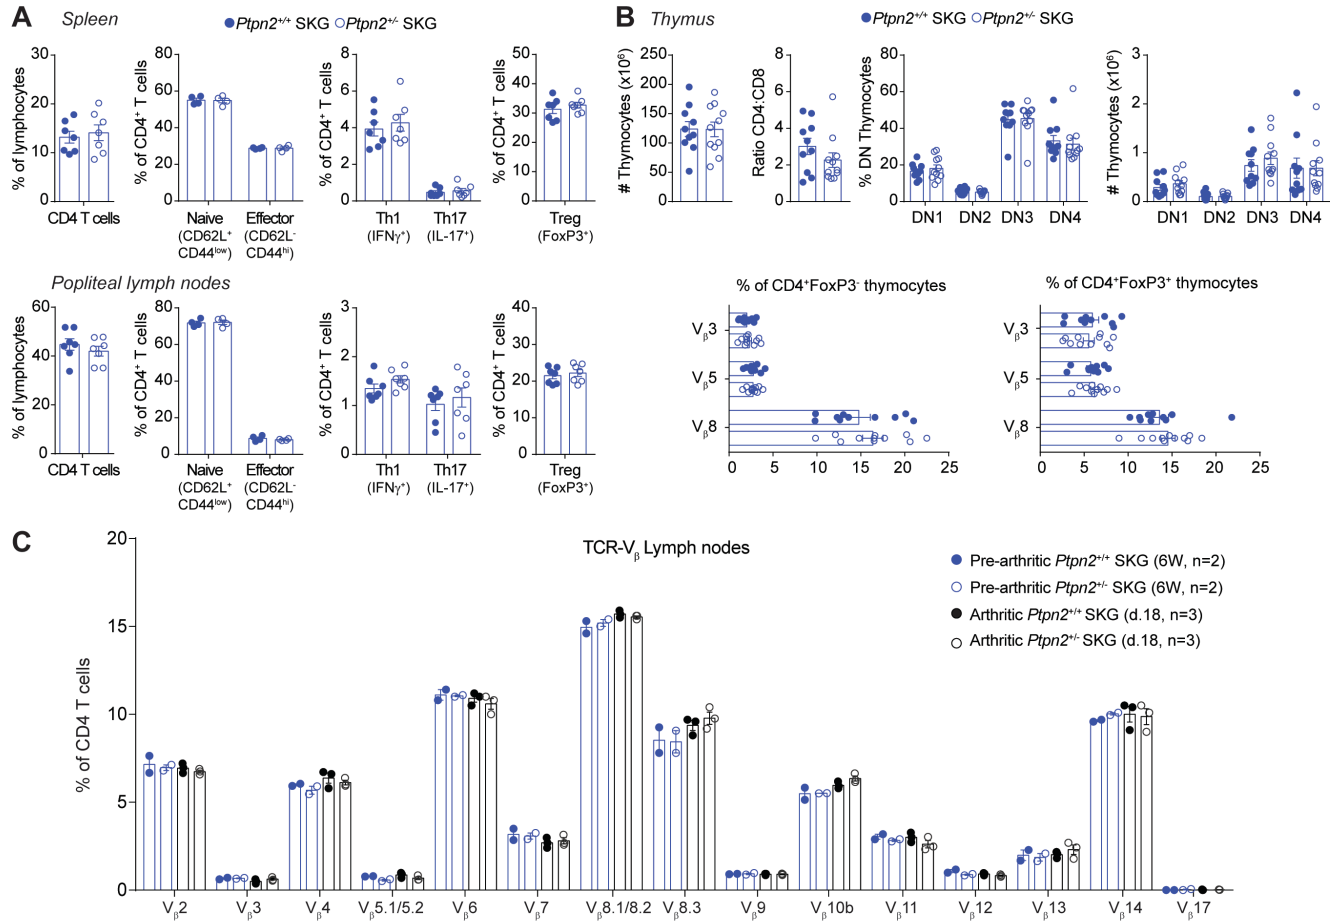

**Supplemental Figure 3. *Ptpn2* haploinsufficient SKG mice show no alteration in naïve and effector CD4 T cells in the pre-arthritic phase, in thymic selection or in the frequency of CD4 T cell clones during arthritis. A)** Frequency of total CD4 T cells and sub populations in the spleen (*upper panels*) and lymph nodes (*lower panels*) isolated from 8-week-old male *Ptpn2*<sup>+/+</sup> (n=7; for naïve and effector n=4) and *Ptpn2*<sup>+/-</sup> (n=7; for naïve and effector n=4) SKG mice. **B)** Evaluation of thymic development in 6-week-old male *Ptpn2*<sup>+/+</sup> (n=10) and *Ptpn2*<sup>+/-</sup> (n=11) SKG mice by flow cytometry. **C)** TCR V $\beta$  repertoire of CD4 SKG T cells analyzed in lymph nodes of pre-arthritic (6-week-old, n=2 per genotype) and arthritic (day 18 after mannan injection, n=3 per genotype) female *Ptpn2*<sup>+/+</sup> and *Ptpn2*<sup>+/-</sup> SKG mice by flow cytometry. Bars represent mean  $\pm$  SEM. Compiled data from two independent experiments is presented in (A-C).

# Supplemental Figure 4

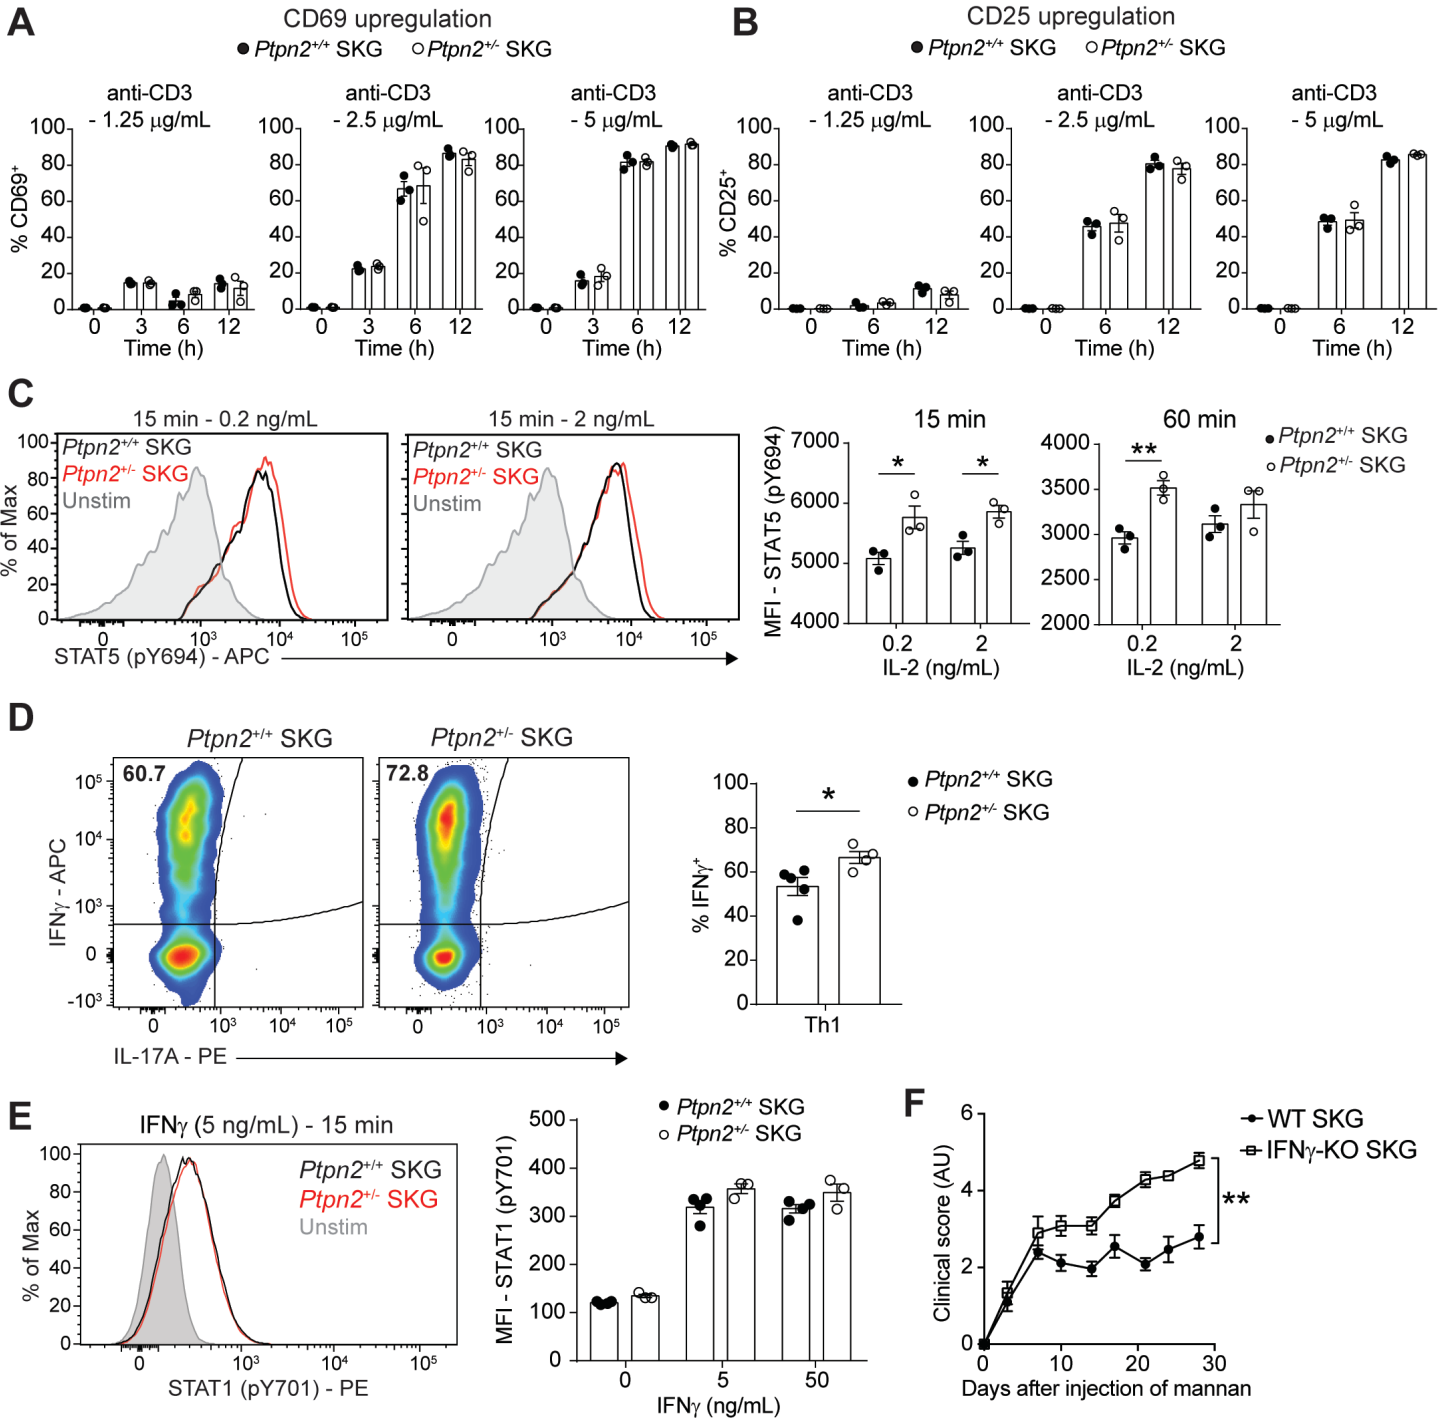

**Supplemental Figure 4. *Ptpn2* haploinsufficiency promotes IL-2 signaling and Th1 polarization.** **A-B)** Induction of CD69 (**A**) and CD25 (**B**) on *Ptpn2*<sup>+/+</sup> (n=3) and *Ptpn2*<sup>+/-</sup> (n=3) naïve CD4 SKG T cells after stimulation with anti-CD3 and anti-CD28. **C)** IL-2 induced induction of STAT5 (pY694) in naïve *Ptpn2*<sup>+/+</sup> (n=3) and *Ptpn2*<sup>+/-</sup> (n=3) CD4 SKG T cells. *Left panels* show representative flow histograms for 15 min stimulations. **D)** In vitro Th1 polarization from naïve *Ptpn2*<sup>+/+</sup> (n=5) and *Ptpn2*<sup>+/-</sup> (n=4) CD4 SKG T cells. *Left panels* show representative flow plots. **E)** Induction of STAT1 (pY701) analyzed by flow cytometry after IFN $\gamma$  stimulation of CD4 T cells isolated from *Ptpn2*<sup>+/+</sup> (n=4) and *Ptpn2*<sup>+/-</sup> (n=3) SKG mice. *Left panel* shows representative flow histograms for 5 ng/mL IFN $\gamma$  stimulation. **F)** Clinical scores of male IFN $\gamma$ -KO (n=6) and WT (n=6) SKG mice after injection of mannan. Each symbol (**A-E**) represents an individual mouse. Compiled data from at least two individual experiments are presented in (**A, B, D, F**). Data in **C** and **E** are representative of two independent experiments. Arthritis severity was quantified utilizing the area under the curve. Bars represent mean  $\pm$  SEM. \**P* < 0.05, \*\**P* < 0.01 by unpaired t-test (**C, D**) or by Mann-Whitney (**F**).

# Supplemental Figure 5

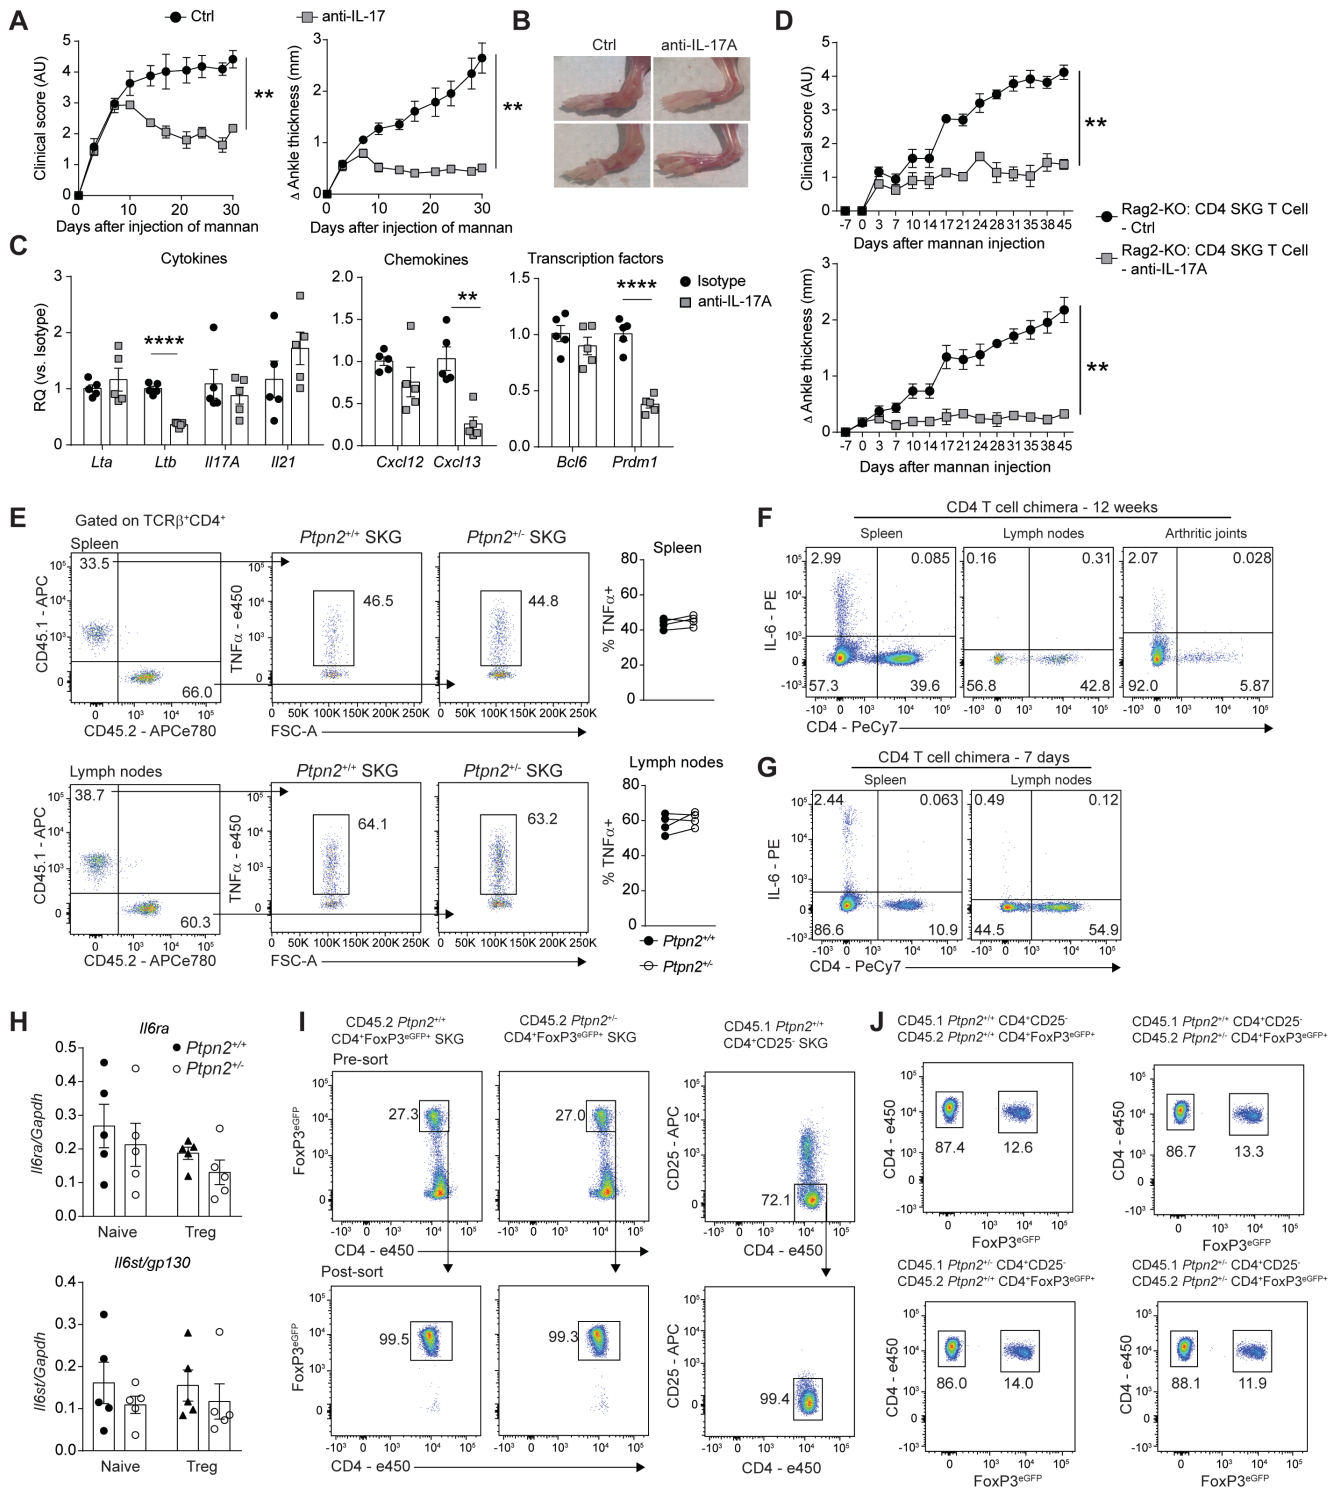

**Supplemental Figure 5. Enhanced IL-17-dependent arthritis in *Pttn2* haploinsufficient mice is not mediated through increased production of TNF and IL-6 or enhanced expression of IL-6R. A)** Clinical scores (*left panel*) and change in ankle thickness (*right panel*) in female SKG mice treated with either anti-IL-17A (100  $\mu$ g, n=5) or isotype control (n=5) antibodies weekly starting at the day of mannan injection. **B)** Representative images of arthritic ankles of mice in **A**. **C)** Expression of genes associated with ELS formation in arthritic ankles from mice in **A**. Data are presented as the relative quantification (RQ) compared to expression in control-treated SKG mice. **D)** Clinical score (*upper panel*) and change in ankle thickness (*lower panel*) of female Rag2-KO mice treated with anti-IL-17A after transfer of CD4 SKG T cells. One week after transfer, Rag2-KO mice were injected with mannan to induce arthritis. Starting at the day of mannan injection mice were treated with either anti-IL-17A antibody (100  $\mu$ g, n=5) or isotype control (n=5). **E)** CD45.1 and CD45.2 CD4 T cells isolated from *Pttn2*<sup>+/+</sup> or *Pttn2*<sup>+/-</sup> male SKG mice were co-transferred into male Rag2-KO mice (n=4). One week after transfer, production of TNF $\alpha$  from CD4 T cells was assessed in spleen (*upper panels*) and lymph nodes (*lower panels*) by flow cytometry. *Left panels* show representative flow plots. **F-G)** Representative flow plots of production of IL-6 in spleen, lymph nodes and arthritic joints 7 days (**F**, n=4) and 11 weeks (**G**, n=3) after co-transfer of CD45.1 and CD45.2 CD4 T cells isolated from *Pttn2*<sup>+/+</sup> and *Pttn2*<sup>+/-</sup> male SKG BALB/c mice into male Rag2-KO mice. **H)** mRNA expression of *Il6ra* and *Il6st/gp130* in naïve (CD4<sup>+</sup>CD62L<sup>+</sup>CD44<sup>low</sup>FoxP3<sup>eGFP-</sup>), and Tregs (CD4<sup>+</sup>FoxP3<sup>eGFP+</sup>) T cells sorted from *Pttn2*<sup>+/+</sup> (n=5) and *Pttn2*<sup>+/-</sup> (n=5) FoxP3<sup>eGFP</sup> SKG mice. **I)** Flow sorting strategy and representative post sorting purity of Tregs (CD4<sup>+</sup>FoxP3<sup>eGFP+</sup>) and CD25 negative CD4 T cells (CD4<sup>+</sup>CD25<sup>-</sup>) used for in vitro conversion assays, transfers to Rag2-KO mice and in vitro suppression assay. **J)** Distribution of CD45.1<sup>+</sup>CD4<sup>+</sup>CD25<sup>-</sup> (*Pttn2*<sup>+/+</sup> *top panels* and *Pttn2*<sup>+/-</sup> *lower panels*) and CD45.2<sup>+</sup> Tregs (CD4<sup>+</sup>FoxP3<sup>eGFP+</sup>, *Pttn2*<sup>+/+</sup> *left panels* and *Pttn2*<sup>+/-</sup> *right panels*) injected into Rag2-KO mice. Experiments in (**E-F**) were performed once. Representative of two independent experiments are shown in (**A, C**). Compiled data from two independent experiments are shown in (**D, H**). Arthritis severity was quantified utilizing the area under the curve. Bars represent mean  $\pm$  SEM. \**P* < 0.05, \*\**P* < 0.01. \*\*\**P* < 0.001, \*\*\*\**P* < 0.0001 by for Mann-Whitney (**A-D**) or unpaired t-test (**C**)

### Supplemental Figure 6

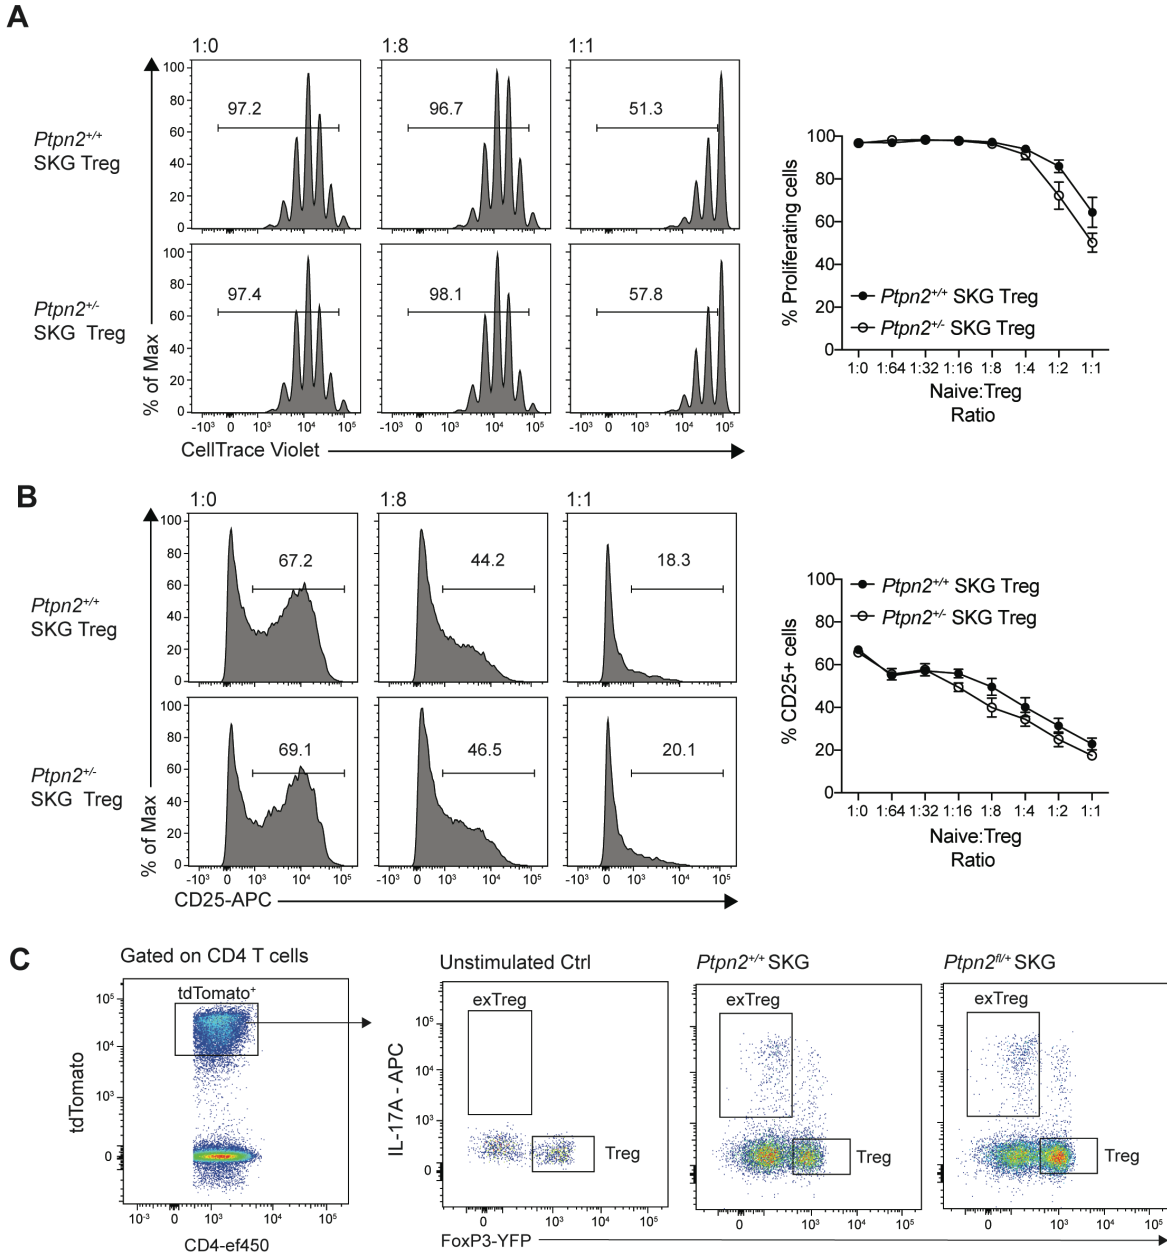

**Supplemental Figure 6. Effect of *Ptpn2* haploinsufficiency for Treg function. A-B)** In vitro Treg suppression assay using sorted CD45.2<sup>+</sup> naïve (CD4<sup>+</sup>CD62L<sup>+</sup>CD44<sup>low</sup>CD25<sup>-</sup>) BALB/c CD4 T cells and CD45.2<sup>+</sup> Tregs (CD4<sup>+</sup>FoxP3<sup>eGFP+</sup>) from *Ptpn2*<sup>+/+</sup> (n=3 individual mice) and *Ptpn2*<sup>+/-</sup> (n=3 individual mice) Foxp3<sup>eGFP</sup> SKG mice. 5x10<sup>4</sup> naïve T cells and varying numbers of Tregs were stimulated for 4 days with 5 µg/mL soluble anti-CD3 and 1x10<sup>5</sup> irradiated Rag2-KO splenocytes as APCs. Proliferation (**A**) and expression of CD25

(B) was evaluated on CellTrace positive naïve BALB/c CD4 T cells using flow cytometry. *Left panels* show representative flow histograms. C) Gating strategy for sorting of IL-17A<sup>+</sup> SKG exTregs and IL-17A<sup>-</sup> SKG Tregs from B6.SKG.H2<sup>d/d</sup>.FoxP3<sup>YFP-cre+/-</sup>.tdTom<sup>fl/+</sup>.Ptpn2<sup>fl/+</sup> fate mapping mice for RNA-seq. Results presented in (A) and (B) represents a single experiment. Bars represent mean ± SEM.

# Supplemental Figure 7

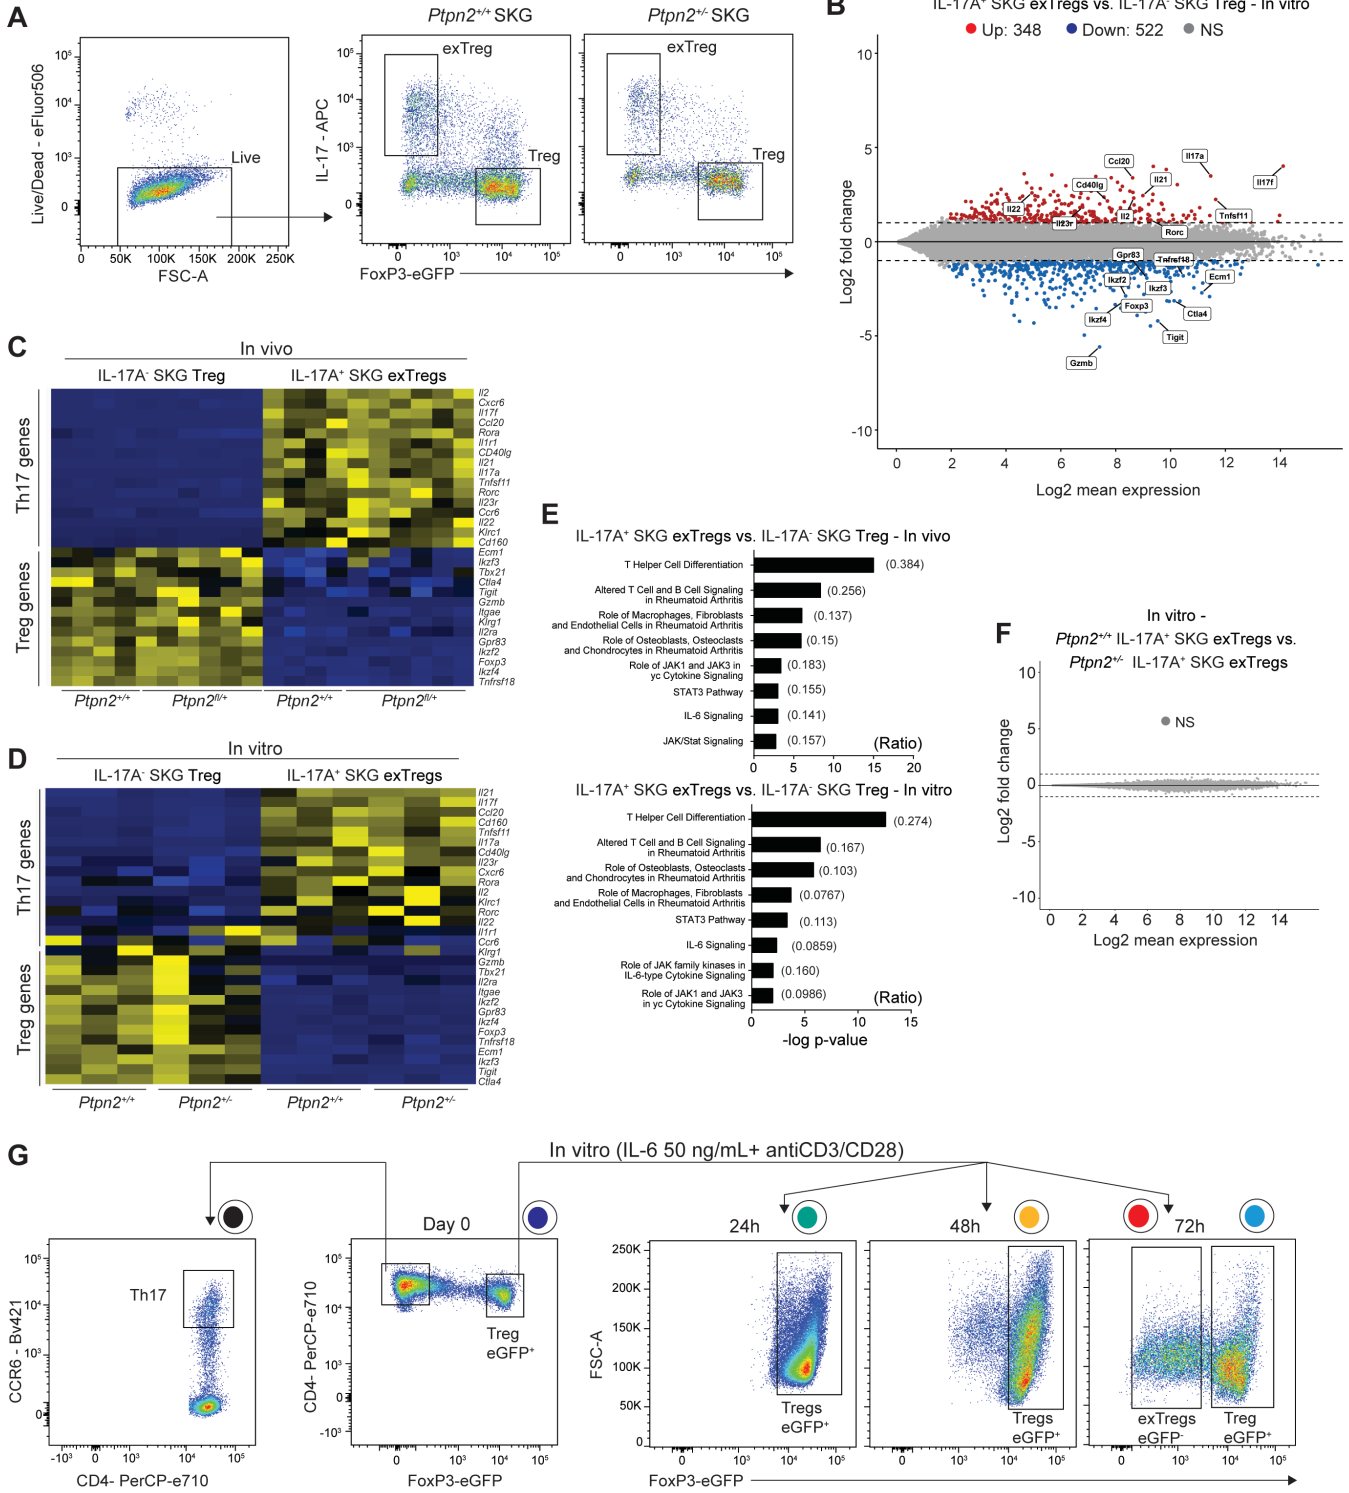



**Supplemental Figure 7. Characterization of in vitro generated IL-17<sup>+</sup> exTregs. A)** Gating strategy for sorting of in vitro generated IL-17A<sup>+</sup> SKG exTregs and IL-17A<sup>-</sup> SKG Tregs for RNA-seq. **B-F)** RNA-Seq performed on IL-17<sup>+</sup> SKG exTregs and IL-17<sup>-</sup> SKG Tregs sorted from *Ptpn2<sup>fl/+</sup>* or *Ptpn2<sup>+/+</sup>* arthritic fate mapping mice or from in vitro conversion assay. **B)** MD-plot of significantly (*P*<sub>adj</sub> < 0.05 and fold change > 2) up-regulated (red) and down-regulated (blue) genes in IL-17A<sup>+</sup> SKG exTregs vs. IL-17A<sup>-</sup> SKG Tregs. **C-D)** Heat-map with 30 selected genes associated with Treg and Th17 differentiation program in IL-17<sup>+</sup> SKG exTregs and IL-17<sup>-</sup> SKG Tregs from fate mapping mice (**C**) or from in vitro conversion assay (**D**). Heat-map was generated with TPM values after normalization for transcript length. Genes with a fold change > 2 and *P*<sub>adj</sub> < 0.05 were used to generate the heat-map. **E)** Pathway analysis of differentially expressed genes in IL-17A<sup>+</sup> SKG exTregs isolated from either fate mapping mice or from in vitro conversion assay. Generated using the Ingenuity Pathway Analysis software (Qiagen) using genes with a fold change > 2 and *P*<sub>adj</sub> < 0.05. **F)** MD-plot comparing *Ptpn2<sup>+/+</sup>* and *Ptpn2<sup>+/-</sup>* IL-17A<sup>+</sup> SKG exTregs generated in vitro. **G)** Gating strategy for sorting of Th17 cells, Tregs and FoxP3<sup>+</sup> Tregs and FoxP3<sup>-</sup> exTregs during in vitro conversion for ATAC-seq analysis and for isolation of exTregs for transfer to Rag2-KO mice.

# Supplemental Figure 8

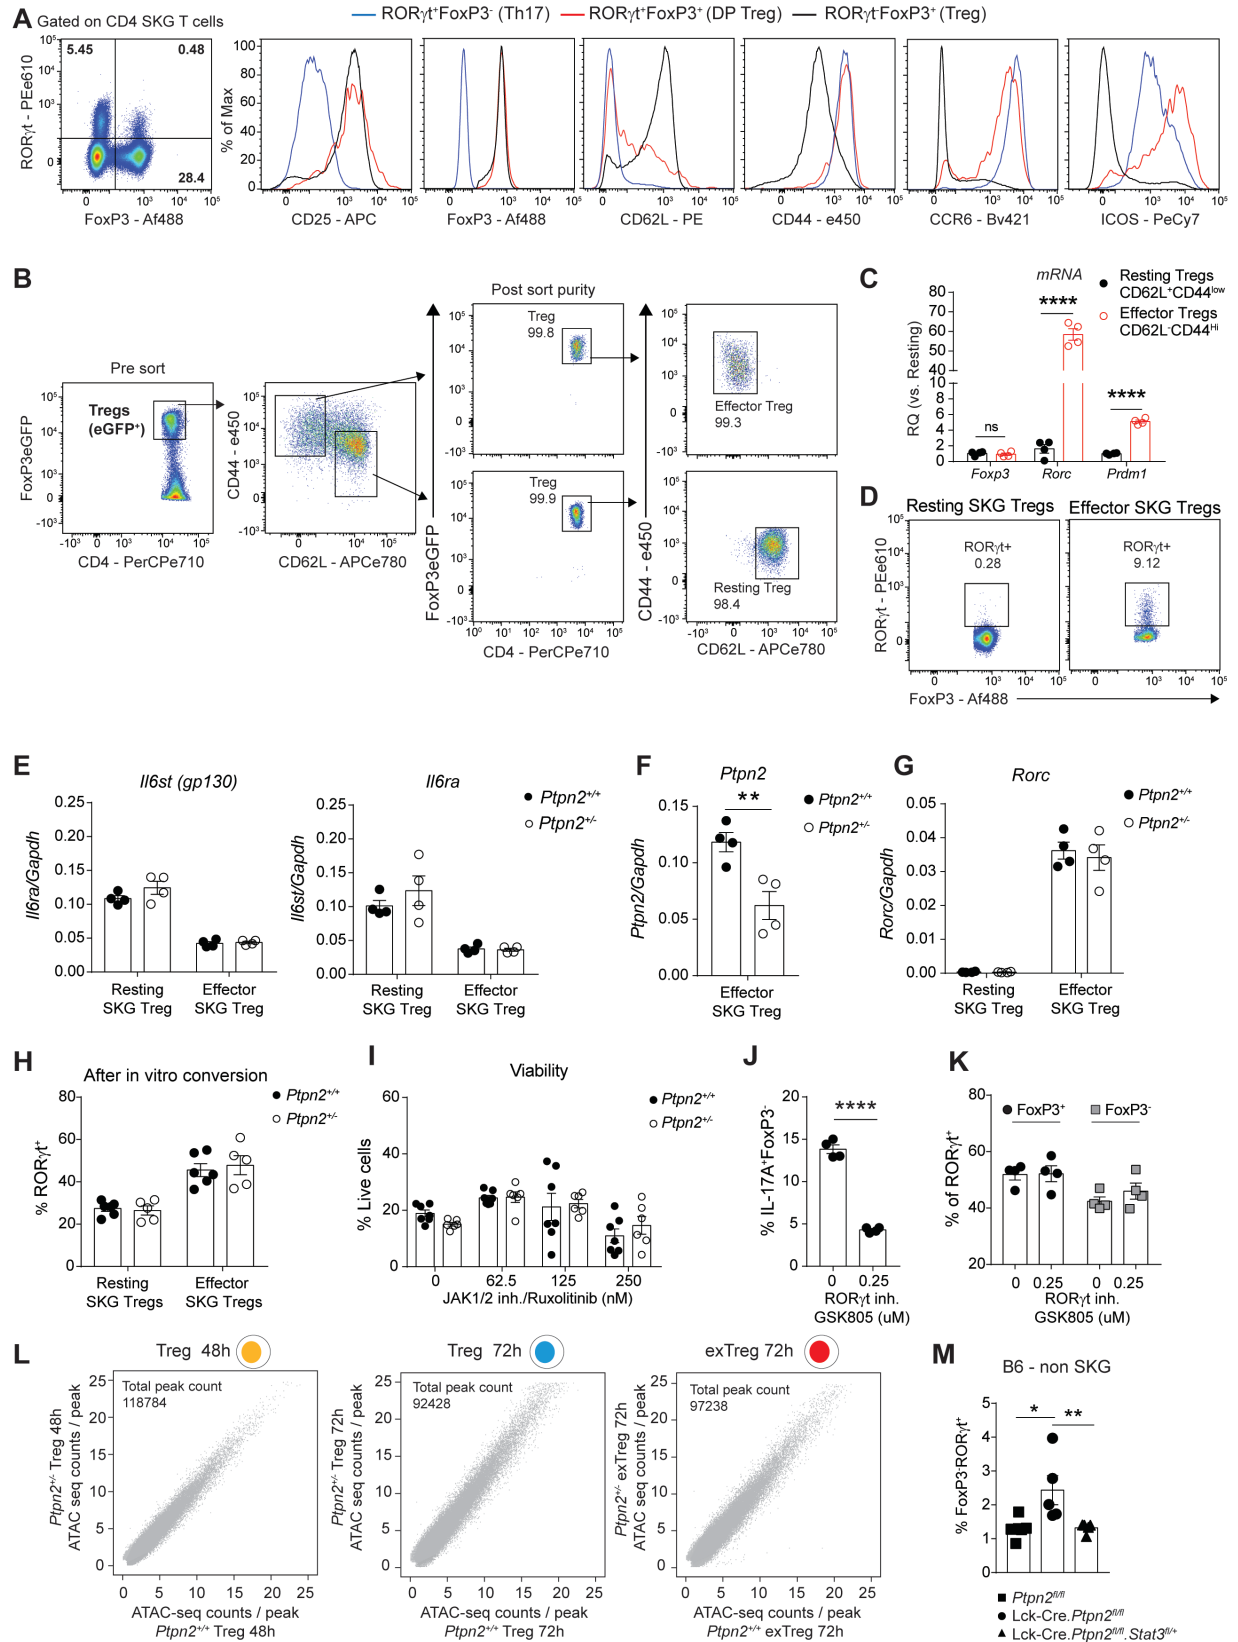

**Supplemental Figure 8. In vitro conversion of effector Tregs is not mediated through the function of ROR $\gamma$ t.** **A)** Representative flow plot comparing the expression of selected markers on ROR $\gamma$ t-expressing Tregs (ROR $\gamma$ t<sup>+</sup>FoxP3<sup>+</sup>), Tregs (ROR $\gamma$ t<sup>+</sup>FoxP3<sup>-</sup>) and Th17 cells (ROR $\gamma$ t<sup>+</sup>FoxP3<sup>-</sup>) in joint draining lymph nodes (brachial, axillary and popliteal) of pre-arthritic female SKG mice (8-week-old). **B)** Gating strategy for flow cytometry based sorting of resting (CD4<sup>+</sup>FoxP3<sup>eGFP+</sup>CD62L<sup>+</sup>CD44<sup>+</sup>) and effector (CD4<sup>+</sup>FoxP3<sup>eGFP+</sup>CD62L<sup>-</sup>CD44<sup>hi</sup>) SKG Tregs and post sorting purity. **C)** Gene-expression of *Foxp3*, *Rorc* and *Prdm1* in sorted effector and resting Tregs from FoxP3<sup>eGFP</sup> SKG mice (n=4). **D)** Representative frequency of ROR $\gamma$ t-expressing cells within resting and effector SKG Tregs. Cells gated on effector and resting SKG Tregs as in **(B)**. **E)** Expression of *Il6ra* and *Il6st* (*gp130*) in resting and effector SKG Tregs sorted as in **(B)** from pooled lymph nodes and spleen of *Ptpn2*<sup>+/+</sup> (n=4) or *Ptpn2*<sup>+/-</sup> (n=4) FoxP3<sup>eGFP</sup> SKG mice. **F)** Expression of *Ptpn2* in effector SKG Tregs sorted as in **(B)** from lymph nodes of *Ptpn2*<sup>+/+</sup> (n=4) or *Ptpn2*<sup>+/-</sup> (n=4) FoxP3<sup>eGFP</sup> SKG mice. **G)** Expression of *Rorc* in *Ptpn2*<sup>+/+</sup> (n=4) and *Ptpn2*<sup>+/-</sup> (n=4) resting and effector SKG Tregs (sorted as in **B)** before in vitro conversion. **H)** Expression of ROR $\gamma$ t in *Ptpn2*<sup>+/+</sup> (n=5) and *Ptpn2*<sup>+/-</sup> (n=6) resting and effector SKG Tregs after 72h of in vitro conversion. **I)** Effect of JAK1/2 inhibition on the viability of *Ptpn2*<sup>+/+</sup> (n=7) and *Ptpn2*<sup>+/-</sup> (n=6) resting SKG Tregs after 72h of in vitro conversion. **J-K)** Effect of ROR $\gamma$ t inhibition on generation of IL-17<sup>+</sup> exTregs (**J**) and loss of FoxP3 from ROR $\gamma$ t<sup>+</sup> Tregs (**K**) during in vitro conversion of *Ptpn2*<sup>+/+</sup> SKG (n=4) Tregs. **L)** Comparison of the ATAC-signal per peak between *Ptpn2*<sup>+/+</sup> and *Ptpn2*<sup>+/-</sup> SKG Tregs during in vitro conversion. One replicate for each genotype is compared. **M)** FoxP3<sup>-</sup>ROR $\gamma$ t<sup>+</sup> cells after in vitro conversion of *Ptpn2*<sup>fl/fl</sup> (n=5), Lck-Cre+*Ptpn2*<sup>fl/fl</sup> (n=5) and Lck-Cre+*Ptpn2*<sup>fl/fl</sup>*Stat3*<sup>fl/+</sup> (n=5) Tregs isolated from non-SKG B6 mice. Compiled data from two independent experiments are shown in **(H, I)**. Data in **(A-G, J, K)** are representative of at least two independent experiments. Symbols represents individual mice. Bars represent mean  $\pm$  SEM. \**P* < 0.05, \*\**P* < 0.01, \*\*\*\**P* < 0.0001 by unpaired t-test (**C, F, J**) or Mann-Whitney (**M**)

## References for supplemental material

1. Bussieres-Marmen S, Vinette V, Gungabeesoon J, Aubry I, Perez-Quintero LA, and Tremblay ML. Loss of T-cell protein tyrosine phosphatase in the intestinal epithelium promotes local inflammation by increasing colonic stem cell proliferation. *Cell Mol Immunol*. 2017.
2. Dalton DK, Pitts-Meek S, Keshav S, Figari IS, Bradley A, and Stewart TA. Multiple defects of immune cell function in mice with disrupted interferon-gamma genes. *Science*. 1993;259(5102):1739-42.
3. Guma M, Ronacher L, Liu-Bryan R, Takai S, Karin M, and Corr M. Caspase 1-independent activation of interleukin-1beta in neutrophil-predominant inflammation. *Arthritis Rheum*. 2009;60(12):3642-50.
4. Seumois G, Vijayanand P, Easley CJ, Omran N, Kalinke L, North M, Ganesan AP, Simpson LJ, Hunkapiller N, Moltzahn F, et al. An integrated nano-scale approach to profile miRNAs in limited clinical samples. *Am J Clin Exp Immunol*. 2012;1(2):70-89.
5. Seumois G, Chavez L, Gerasimova A, Lienhard M, Omran N, Kalinke L, Vedanayagam M, Ganesan AP, Chawla A, Djukanovic R, et al. Epigenomic analysis of primary human T cells reveals enhancers associated with TH2 memory cell differentiation and asthma susceptibility. *Nat Immunol*. 2014;15(8):777-88.
6. Picelli S, Faridani OR, Bjorklund AK, Winberg G, Sagasser S, and Sandberg R. Full-length RNA-seq from single cells using Smart-seq2. *Nat Protoc*. 2014;9(1):171-81.
7. Buenrostro JD, Giresi PG, Zaba LC, Chang HY, and Greenleaf WJ. Transposition of native chromatin for fast and sensitive epigenomic profiling of open chromatin, DNA-binding proteins and nucleosome position. *Nat Methods*. 2013;10(12):1213-8.
8. Corces MR, Trevino AE, Hamilton EG, Greenside PG, Sinnott-Armstrong NA, Vesuna S, Satpathy AT, Rubin AJ, Montine KS, Wu B, et al. An improved ATAC-seq protocol reduces background and enables interrogation of frozen tissues. *Nat Methods*. 2017;14(10):959-62.
9. Langmead B, Trapnell C, Pop M, and Salzberg SL. Ultrafast and memory-efficient alignment of short DNA sequences to the human genome. *Genome Biol*. 2009;10(3):R25.
10. Langmead B, and Salzberg SL. Fast gapped-read alignment with Bowtie 2. *Nat Methods*. 2012;9(4):357-9.
11. Li H, Handsaker B, Wysoker A, Fennell T, Ruan J, Homer N, Marth G, Abecasis G, Durbin R, and Genome Project Data Processing S. The Sequence Alignment/Map format and SAMtools. *Bioinformatics*. 2009;25(16):2078-9.
12. Ramirez F, Ryan DP, Gruning B, Bhardwaj V, Kilpert F, Richter AS, Heyne S, Dundar F, and Manke T. deepTools2: a next generation web server for deep-sequencing data analysis. *Nucleic Acids Res*. 2016;44(W1):W160-5.
13. Zhang Y, Liu T, Meyer CA, Eeckhoute J, Johnson DS, Bernstein BE, Nusbaum C, Myers RM, Brown M, Li W, et al. Model-based analysis of ChIP-Seq (MACS). *Genome Biol*. 2008;9(9):R137.
14. Quinlan AR, and Hall IM. BEDTools: a flexible suite of utilities for comparing genomic features. *Bioinformatics*. 2010;26(6):841-2.
15. Scott-Browne JP, Lopez-Moyado IF, Trifari S, Wong V, Chavez L, Rao A, and Pereira RM. Dynamic Changes in Chromatin Accessibility Occur in CD8(+) T Cells Responding to Viral Infection. *Immunity*. 2016;45(6):1327-40.

16. Love MI, Huber W, and Anders S. Moderated estimation of fold change and dispersion for RNA-seq data with DESeq2. *Genome Biol.* 2014;15(12):550.
17. Heinz S, Benner C, Spann N, Bertolino E, Lin YC, Laslo P, Cheng JX, Murre C, Singh H, and Glass CK. Simple combinations of lineage-determining transcription factors prime cis-regulatory elements required for macrophage and B cell identities. *Mol Cell.* 2010;38(4):576-89.
18. Schmiedel BJ, Seumois G, Samaniego-Castruita D, Cayford J, Schulten V, Chavez L, Ay F, Sette A, Peters B, and Vijayanand P. 17q21 asthma-risk variants switch CTCF binding and regulate IL-2 production by T cells. *Nat Commun.* 2016;7(13426).
19. Yu W, Yesupriya A, Wulf A, Hindorff LA, Dowling N, Khoury MJ, and Gwinn M. GWAS Integrator: a bioinformatics tool to explore human genetic associations reported in published genome-wide association studies. *Eur J Hum Genet.* 2011;19(10):1095-9.
20. Ward LD, and Kellis M. HaploReg: a resource for exploring chromatin states, conservation, and regulatory motif alterations within sets of genetically linked variants. *Nucleic Acids Res.* 2012;40(Database issue):D930-4.
21. Consortium EP. An integrated encyclopedia of DNA elements in the human genome. *Nature.* 2012;489(7414):57-74.
22. Bernstein BE, Stamatoyannopoulos JA, Costello JF, Ren B, Milosavljevic A, Meissner A, Kellis M, Marra MA, Beaudet AL, Ecker JR, et al. The NIH Roadmap Epigenomics Mapping Consortium. *Nat Biotechnol.* 2010;28(10):1045-8.
23. Xie L, Zhang YL, and Zhang ZY. Design and characterization of an improved protein tyrosine phosphatase substrate-trapping mutant. *Biochemistry.* 2002;41(12):4032-9.
24. Becker S, Corthals GL, Aebersold R, Groner B, and Muller CW. Expression of a tyrosine phosphorylated, DNA binding Stat3beta dimer in bacteria. *FEBS Lett.* 1998;441(1):141-7.

**Table S1.** GWAS-derived lead SNPs (highlighted in gray) and SNPs in tight genetic linkage.

| Chromosome | Position (hg19) | Variant     | Ref    | Alt | AFR  | AMR  | ASN  | EUR  |
|------------|-----------------|-------------|--------|-----|------|------|------|------|
| 18         | 12 774 326      | rs2014857   | C      | T   | 0,81 | 0,86 | 0,84 | 0,85 |
| 18         | 12 774 639      | rs34560559  | GTA    | G   | 0,11 | 0,11 | 0,16 | 0,13 |
| 18         | 12 774 894      | rs888270    | G      | A   | 0,01 | 0,11 | 0,16 | 0,15 |
| 18         | 12 775 049      | rs199624676 | 10-mer | G   | 0,08 | 0,11 | 0,14 | 0,14 |
| 18         | 12 775 050      | rs142342883 | 11-mer | G   | 0,09 | 0,12 | 0,15 | 0,13 |
| 18         | 12 775 591      | rs2847260   | C      | T   | 0,80 | 0,86 | 0,84 | 0,85 |
| 18         | 12 775 821      | rs2847259   | A      | C   | 0,58 | 0,76 | 0,84 | 0,71 |
| 18         | 12 775 851      | rs2542147   | G      | T   | 0,80 | 0,86 | 0,84 | 0,85 |
| 18         | 12 777 325      | rs7237497   | T      | C   | 0,83 | 0,87 | 0,84 | 0,84 |
| 18         | 12 777 573      | rs2542148   | C      | G   | 0,82 | 0,86 | 0,84 | 0,85 |
| 18         | 12 777 603      | rs2847274   | T      | C   | 0,82 | 0,86 | 0,84 | 0,84 |
| 18         | 12 778 715      | rs2847278   | C      | T   | 0,83 | 0,87 | 0,84 | 0,85 |
| 18         | 12 779 018      | rs2542149   | G      | A   | 0,83 | 0,87 | 0,84 | 0,85 |
| 18         | 12 779 342      | rs2847280   | A      | G   | 0,83 | 0,87 | 0,84 | 0,85 |
| 18         | 12 779 763      | rs2542150   | G      | C   | 0,83 | 0,87 | 0,84 | 0,85 |
| 18         | 12 779 947      | rs2542151   | G      | T   | 0,83 | 0,87 | 0,84 | 0,85 |
| 18         | 12 780 456      | rs9952749   | A      | G   | 0,76 | 0,83 | 0,81 | 0,79 |
| 18         | 12 782 448      | rs2847293   | A      | T   | 0,79 | 0,86 | 0,84 | 0,84 |
| 18         | 12 782 849      | rs6505765   | C      | G   | 0,38 | 0,28 | 0,34 | 0,32 |
| 18         | 12 783 086      | rs34920518  | A      | G   | 0,05 | 0,11 | 0,16 | 0,15 |
| 18         | 12 789 556      | rs11663253  | A      | G   | 0,05 | 0,07 | 0,16 | 0,16 |
| 18         | 12 792 736      | rs60474474  | C      | T   | 0,04 | 0,07 | 0,16 | 0,16 |
| 18         | 12 792 940      | rs45450798  | C      | G   | 0,05 | 0,07 | 0,16 | 0,16 |
| 18         | 12 795 420      | rs60751993  | G      | A   | 0,05 | 0,07 | 0,16 | 0,16 |
| 18         | 12 795 470      | rs60735058  | T      | A   | 0,05 | 0,07 | 0,16 | 0,16 |
| 18         | 12 797 694      | rs2847297   | A      | G   | 0,57 | 0,27 | 0,34 | 0,32 |
| 18         | 12 805 388      | rs12967678  | G      | A   | 0,02 | 0,04 | 0,15 | 0,11 |
| 18         | 12 808 140      | rs8096138   | C      | G   | 0,04 | 0,07 | 0,16 | 0,16 |
| 18         | 12 808 466      | rs35153695  | AC     | A   | 0,04 | 0,07 | 0,16 | 0,16 |
| 18         | 12 809 340      | rs1893217   | A      | G   | 0,05 | 0,07 | 0,16 | 0,16 |
| 18         | 12 812 896      | rs2847288   | C      | G   | 0,48 | 0,81 | 0,83 | 0,83 |
| 18         | 12 818 922      | rs80262450  | G      | A   | 0,01 | 0,03 | 0,14 | 0,11 |
| 18         | 12 821 903      | rs16939895  | G      | A   | 0,21 | 0,11 | 0,37 | 0,15 |
| 18         | 12 823 056      | rs547268    | G      | T   | 0,62 | 0,86 | 0,63 | 0,85 |
| 18         | 12 823 402      | rs658158    | T      | G   | 0,60 | 0,86 | 0,64 | 0,85 |
| 18         | 12 826 385      | rs8091566   | G      | A   | 0,61 | 0,85 | 0,63 | 0,85 |
| 18         | 12 842 480      | rs12969241  | G      | T   | 0,01 | 0,04 | 0,16 | 0,11 |
| 18         | 12 842 567      | rs35967540  | G      | C   | 0,01 | 0,04 | 0,16 | 0,11 |
| 18         | 12 842 681      | rs35320197  | C      | A   | 0,01 | 0,04 | 0,16 | 0,11 |
| 18         | 12 843 137      | rs11875687  | T      | C   | 0,20 | 0,10 | 0,32 | 0,15 |
| 18         | 12 847 136      | rs657555    | C      | T   | 0,61 | 0,88 | 0,68 | 0,85 |
| 18         | 12 850 211      | rs612058    | T      | C   | 0,62 | 0,88 | 0,68 | 0,86 |
| 18         | 12 853 458      | rs487273    | T      | G   | 0,62 | 0,88 | 0,68 | 0,86 |
| 18         | 12 854 072      | rs514000    | C      | T   | 0,38 | 0,84 | 0,64 | 0,85 |
| 18         | 12 855 440      | rs484020    | G      | A   | 0,33 | 0,84 | 0,64 | 0,85 |
| 18         | 12 855 646      | rs482160    | A      | G   | 0,55 | 0,86 | 0,64 | 0,85 |
| 18         | 12 855 864      | rs34153303  | G      | A   | 0,01 | 0,04 | 0,16 | 0,11 |
| 18         | 12 857 335      | rs534911    | G      | A   | 0,42 | 0,84 | 0,64 | 0,85 |
| 18         | 12 857 761      | rs637643    | C      | T   | 0,45 | 0,89 | 0,84 | 0,96 |
| 18         | 12 858 610      | rs579052    | T      | C   | 0,45 | 0,85 | 0,68 | 0,85 |
| 18         | 12 860 934      | rs515151    | G      | C   | 0,62 | 0,88 | 0,68 | 0,85 |
| 18         | 12 862 395      | rs683468    | T      | A   | 0,45 | 0,89 | 0,84 | 0,97 |
| 18         | 12 862 942      | rs670671    | A      | C   | 0,45 | 0,89 | 0,84 | 0,97 |
| 18         | 12 863 840      | rs34799913  | T      | G   | 0,01 | 0,04 | 0,16 | 0,11 |
| 18         | 12 864 674      | rs507304    | G      | C   | 0,45 | 0,88 | 0,84 | 0,97 |
| 18         | 12 864 762      | rs12955302  | A      | G   | 0,01 | 0,04 | 0,16 | 0,11 |
| 18         | 12 864 975      | rs34735114  | CAA    | C   | 0,46 | 0,84 | 0,68 | 0,85 |
| 18         | 12 865 822      | rs34416003  | A      | C   | 0,01 | 0,04 | 0,16 | 0,10 |
| 18         | 12 868 506      | rs9959425   | T      | C   | 0,55 | 0,15 | 0,32 | 0,14 |

|    |            |             |   |        |      |      |      |      |
|----|------------|-------------|---|--------|------|------|------|------|
| 18 | 12 870 038 | rs9959061   | C | T      | 0,54 | 0,11 | 0,16 | 0,03 |
| 18 | 12 870 267 | rs200065651 | T | TAC    | 0,03 | 0,03 | 0,14 | 0,11 |
| 18 | 12 870 506 | rs58509084  | G | 10-mer | 0,46 | 0,15 | 0,28 | 0,12 |
| 18 | 12 870 510 | rs58881251  | T | 7-mer  | 0,44 | 0,15 | 0,29 | 0,13 |
| 18 | 12 870 870 | rs8091305   | C | T      | 0,53 | 0,11 | 0,16 | 0,03 |
| 18 | 12 871 972 | rs12964314  | A | G      | 0,01 | 0,04 | 0,15 | 0,11 |
| 18 | 12 872 424 | rs71353227  | C | A      | 0,01 | 0,04 | 0,15 | 0,11 |
| 18 | 12 873 318 | rs113404634 | A | G      | 0,55 | 0,11 | 0,16 | 0,03 |
| 18 | 12 875 522 | rs201079562 | G | GT     | 0,55 | 0,15 | 0,31 | 0,15 |
| 18 | 12 875 975 | rs34846641  | A | G      | 0,58 | 0,15 | 0,32 | 0,15 |
| 18 | 12 877 060 | rs7234029   | A | G      | 0,57 | 0,15 | 0,32 | 0,15 |
| 18 | 12 878 582 | rs12963474  | C | A      | 0,01 | 0,04 | 0,16 | 0,11 |
| 18 | 12 879 466 | rs12968719  | G | A      | 0,01 | 0,04 | 0,16 | 0,11 |
| 18 | 12 879 737 | rs8084365   | T | A      | 0,56 | 0,12 | 0,16 | 0,04 |
| 18 | 12 880 206 | rs7241016   | A | G      | 0,57 | 0,15 | 0,32 | 0,15 |
| 18 | 12 881 361 | rs8083786   | A | G      | 0,57 | 0,15 | 0,32 | 0,15 |
| 18 | 12 883 939 | rs9961931   | A | C      | 0,56 | 0,12 | 0,16 | 0,03 |
| 18 | 12 884 676 | rs8098730   | A | T      | 0,56 | 0,12 | 0,16 | 0,03 |
| 18 | 12 885 577 | rs35923716  | A | G      | 0,01 | 0,04 | 0,15 | 0,11 |
| 18 | 12 886 441 | rs35954636  | T | G      | 0,01 | 0,03 | 0,15 | 0,11 |

---

**Table S2.** Analysis of publically available DNase-Seq datasets (ENCODE Project Consortium, see **Methods**), DNase hypersensitivity sites (DHS) in *PTPN2* locus in primary cell types (n=212), fetal tissues (n=279) and cell lines (n=107); in alphabetical order.

| Cell type or tissue (group name)                     | Sample title (obtained from ENCODE master file) | DHS genome-wide | DHS in <i>PTPN2</i> locus ** |
|------------------------------------------------------|-------------------------------------------------|-----------------|------------------------------|
| Amniotic epithelial cells                            | HAEPiC-DS12663                                  | 258,482         | 19                           |
| Amniotic epithelial cells                            | HAEPiC-DS12673                                  | 253,993         | 19                           |
| Aortic adventitial fibroblasts                       | AoAF-DS13513                                    | 214,489         | 9                            |
| Aortic adventitial fibroblasts                       | AoAF-DS13523                                    | 224,168         | 13                           |
| Astrocytes                                           | HAc-DS14765                                     | 231,197         | 14                           |
| Astrocytes                                           | HAc-DS14770                                     | 194,994         | 11                           |
| Astrocytes                                           | HAh-DS15192                                     | 259,294         | 15                           |
| Astrocytes                                           | HAh-DS15202                                     | 231,377         | 15                           |
| Astrocytes                                           | HAsp-DS14790                                    | 251,490         | 13                           |
| Astrocytes                                           | HAsp-DS14794                                    | 225,989         | 14                           |
| Astrocytes                                           | NHA-DS12800                                     | 246,721         | 13                           |
| Astrocytes                                           | NHA-DS12805                                     | 206,072         | 13                           |
| B cells                                              | CD19-DS17186                                    | 122,910         | 19                           |
| B cells                                              | CD19-DS17281                                    | 111,460         | 12                           |
| B cells                                              | CD19-DS17440                                    | 114,984         | 14                           |
| B cells                                              | CD20-DS17371                                    | 222,477         | 17                           |
| B cells                                              | CD20-DS17541                                    | 138,789         | 17                           |
| B cells                                              | CD20-DS18208                                    | 131,909         | 14                           |
| Blood microvascular endothelial cells                | HMVEC_dBIAd-DS13329                             | 210,686         | 8                            |
| Blood microvascular endothelial cells                | HMVEC_dBIAd-DS13337                             | 205,904         | 9                            |
| Blood microvascular endothelial cells                | HMVEC_dLyAd-DS13256                             | 170,685         | 12                           |
| Blood microvascular endothelial cells                | HMVEC_dLyAd-DS13261                             | 162,792         | 11                           |
| Blood microvascular endothelial cells                | HMVEC_dNeo-DS12929                              | 186,986         | 10                           |
| Blood microvascular endothelial cells                | HMVEC_dNeo-DS12937                              | 180,984         | 9                            |
| Blood microvascular endothelial cells (lung derived) | HMVEC_LBI-DS13372                               | 216,243         | 7                            |
| Blood microvascular endothelial cells (lung derived) | HMVEC_LBI-DS13375                               | 198,617         | 7                            |
| Brain microvascular endothelial cells                | HBMEC-DS13806                                   | 217,766         | 12                           |
| Brain microvascular endothelial cells                | HBMEC-DS13817                                   | 254,940         | 10                           |
| Brain vascular pericytes                             | HBVP-DS14834                                    | 264,939         | 21                           |
| Brain vascular smooth muscle cells                   | HBVSMC-DS14845                                  | 208,588         | 22                           |
| Brain vascular smooth muscle cells                   | HBVSMC-DS14860                                  | 207,383         | 22                           |
| Bronchial epithelial cells (BEC)                     | NHBE_RA-DS11959                                 | 206,052         | 22                           |
| Bronchial epithelial cells (BEC)                     | NHBE_RA-DS11969                                 | 191,959         | 20                           |
| Cardiac fibroblasts                                  | HCF-DS12491                                     | 216,472         | 13                           |
| Cardiac fibroblasts                                  | HCF-DS12501                                     | 227,062         | 16                           |
| Cardiac fibroblasts                                  | HCFaa-DS13480                                   | 234,383         | 21                           |
| Cardiac fibroblasts                                  | HCFaa-DS13484                                   | 221,282         | 13                           |
| Cardiac myocytes                                     | HCM-DS12589                                     | 210,319         | 11                           |
| Cardiac myocytes                                     | HCM-DS12599                                     | 248,563         | 14                           |
| CD3 <sup>+</sup> T cells *                           | CD3_CordBlood-DS17702                           | 106,424         | 14                           |
| CD3 <sup>+</sup> T cells *                           | CD3_CordBlood-DS17706                           | 114,817         | 15                           |
| CD3 <sup>+</sup> T cells *                           | CD3-DS11148                                     | 84,250          | 14                           |
| CD3 <sup>+</sup> T cells *                           | CD3-DS16834                                     | 133,921         | 22                           |
| CD3 <sup>+</sup> T cells *                           | CD3-DS17198                                     | 121,716         | 17                           |
| CD3 <sup>+</sup> T cells *                           | CD3-DS17534                                     | 120,488         | 18                           |
| CD34 <sup>+</sup> cells                              | CD34-DS11202                                    | 156,100         | 12                           |
| CD34 <sup>+</sup> cells                              | CD34-DS11666                                    | 170,887         | 16                           |
| CD34 <sup>+</sup> cells                              | CD34-DS12274                                    | 187,144         | 15                           |
| CD34 <sup>+</sup> cells                              | CD34-DS12336                                    | 162,461         | 10                           |
| CD34 <sup>+</sup> cells                              | CD34-DS12339                                    | 151,146         | 10                           |
| CD34 <sup>+</sup> cells                              | CD34-DS12734                                    | 178,420         | 13                           |
| CD34 <sup>+</sup> cells                              | CD34-DS12771                                    | 152,790         | 14                           |
| CD34 <sup>+</sup> cells                              | CD34-DS12774                                    | 175,406         | 12                           |
| CD34 <sup>+</sup> cells                              | CD34-DS12785                                    | 185,488         | 12                           |
| CD34 <sup>+</sup> cells                              | CD34-DS13196                                    | 164,460         | 12                           |
| CD34 <sup>+</sup> cells                              | CD34-DS13199                                    | 148,010         | 11                           |
| CD34 <sup>+</sup> cells                              | CD34-DS14040                                    | 154,490         | 12                           |
| CD34 <sup>+</sup> cells                              | CD34-DS14129                                    | 171,584         | 15                           |
| CD34 <sup>+</sup> cells                              | CD34-DS14197                                    | 162,221         | 13                           |
| CD34 <sup>+</sup> cells                              | CD34-DS14206                                    | 155,421         | 11                           |
| CD34 <sup>+</sup> cells                              | CD34-DS16814                                    | 205,890         | 15                           |



|                                                          |                            |         |    |
|----------------------------------------------------------|----------------------------|---------|----|
| CD34 <sup>+</sup> cells                                  | CD34-DS17112               | 169,023 | 10 |
| CD4 <sup>+</sup> naïve T cells                           | CD4pos_N-DS14108           | 104,757 | 14 |
| CD4 <sup>+</sup> naïve T cells                           | CD4pos_N-DS15241           | 112,691 | 17 |
| CD4 <sup>+</sup> primary T cells *                       | CD4-DS15947                | 124,669 | 13 |
| CD4 <sup>+</sup> primary T cells *                       | CD4-DS16955                | 124,567 | 19 |
| CD4 <sup>+</sup> primary T cells *                       | CD4-DS17175                | 117,858 | 14 |
| CD4 <sup>+</sup> primary T cells *                       | CD4-DS17212                | 143,940 | 24 |
| CD4 <sup>+</sup> primary T cells *                       | CD4-DS17329                | 118,538 | 14 |
| CD4 <sup>+</sup> primary T cells *                       | CD4-DS17881                | 121,706 | 13 |
| CD8 <sup>+</sup> T cells                                 | CD8-DS16012                | 124,099 | 26 |
| CD8 <sup>+</sup> T cells                                 | CD8-DS16962                | 133,266 | 17 |
| CD8 <sup>+</sup> T cells                                 | CD8-DS17203                | 124,572 | 23 |
| CD8 <sup>+</sup> T cells                                 | CD8-DS17332                | 108,905 | 16 |
| CD8 <sup>+</sup> T cells                                 | CD8-DS17885                | 114,186 | 16 |
| Choroid plexus epithelial cells                          | HCPEpiC-DS12447            | 267,753 | 15 |
| Choroid plexus epithelial cells                          | HCPEpiC-DS12457            | 236,411 | 20 |
| Conjunctival fibroblast                                  | HConF-DS11637              | 211,867 | 15 |
| Conjunctival fibroblast                                  | HConF-DS11642              | 199,405 | 8  |
| Dermal fibroblasts                                       | NHDF_Ad-DS12855            | 281,371 | 9  |
| Dermal fibroblasts                                       | NHDF_Ad-DS12863            | 288,809 | 9  |
| Dermal fibroblasts                                       | NHDF_Neo-DS11918           | 228,433 | 10 |
| Dermal fibroblasts                                       | NHDF_Neo-DS11923           | 240,920 | 13 |
| Dermal microvascular endothelial cells                   | HMVEC_dAd-DS12952          | 131,768 | 8  |
| Dermal microvascular endothelial cells                   | HMVEC_dAd-DS12957          | 160,720 | 7  |
| Dermal microvascular endothelial cells                   | HMVEC_dBiNeo-DS13233       | 202,620 | 8  |
| Dermal microvascular endothelial cells                   | HMVEC_dBiNeo-DS13242       | 214,283 | 8  |
| Epidermal keratinocytes                                  | NHEK-DS11474               | 184,655 | 12 |
| Epidermal keratinocytes                                  | NHEK-DS11476               | 192,267 | 14 |
| Epidermal keratinocytes                                  | wgEncodeOpenChromDnaseNhek | 200,797 | 18 |
| Esophageal epithelial cells                              | HEEpiC-DS12763             | 258,684 | 20 |
| Esophageal epithelial cells                              | HEEpiC-DS12768             | 226,493 | 21 |
| Fibroblasts                                              | GM04503D-DS18637           | 254,114 | 10 |
| Fibroblasts                                              | GM04503D-DS18640           | 236,114 | 12 |
| Fibroblasts                                              | GM04504A-DS18973           | 241,248 | 10 |
| Fibroblasts                                              | GM04504A-DS18975           | 239,567 | 8  |
| Gastric mucosa                                           | Gastric_Mucosa-DS20260     | 225,013 | 16 |
| Gastric mucosa                                           | Gastric_Mucosa-DS20748     | 202,447 | 17 |
| Gingival fibroblasts                                     | HGF-DS11738                | 185,889 | 15 |
| Gingival fibroblasts                                     | HGF-DS11752                | 189,032 | 16 |
| Gum tissue fibroblasts                                   | AG09319-DS12286            | 184,998 | 12 |
| Gum tissue fibroblasts                                   | AG09319-DS12291            | 184,591 | 10 |
| Heart tissue                                             | Heart-DS20383              | 212,644 | 9  |
| Iris pigment epithelial cells                            | HIPEpiC-DS12684            | 284,533 | 20 |
| Iris pigment epithelial cells                            | HIPEpiC-DS12689            | 292,052 | 25 |
| Lung fibroblasts                                         | HPF-DS13380                | 214,583 | 16 |
| Lung fibroblasts                                         | HPF-DS13390                | 200,685 | 11 |
| Lung fibroblasts                                         | NHLF-DS12829               | 263,408 | 11 |
| Lung fibroblasts                                         | NHLF-DS12834               | 229,654 | 8  |
| Lymphatic microvascular endothelial cells                | HMVEC_dLyNeo-DS13146       | 195,084 | 9  |
| Lymphatic microvascular endothelial cells                | HMVEC_dLyNeo-DS13150       | 195,596 | 8  |
| Lymphatic microvascular endothelial cells (lung derived) | HMVEC_LLy-DS13185          | 183,694 | 12 |
| Lymphatic microvascular endothelial cells (lung derived) | HMVEC_LLy-DS13193          | 170,635 | 12 |
| Mammary epithelial cells                                 | HMEC-DS13921               | 184,269 | 18 |
| Mammary epithelial cells                                 | HMEC-DS8680                | 180,105 | 15 |
| Mammary epithelial cells                                 | vHMEC-DS18406              | 213,890 | 16 |
| Mammary epithelial cells                                 | vHMEC-DS18438              | 211,487 | 14 |
| Mammary epithelial cells                                 | wgEncodeOpenChromDnaseHmec | 344,204 | 28 |
| Mammary fibroblasts                                      | HMF-DS13363                | 227,877 | 11 |
| Mammary fibroblasts                                      | HMF-DS13368                | 241,303 | 10 |
| Marrow stromal cells                                     | HS27a-DS16602              | 204,602 | 16 |
| Marrow stromal cells                                     | HS5-DS16597                | 226,005 | 8  |
| Mesenchymal stem cells (H1 derived)                      | MSC-DS20514                | 278,237 | 19 |
| Mesenchymal stem cells (H1 derived)                      | MSC-DS20518                | 227,074 | 15 |
| Mesenchymal stem cells (H1 derived)                      | MSC-DS20671                | 210,267 | 10 |
| Mesenchymal stem cells (H1 derived)                      | MSC-DS21042                | 228,391 | 13 |
| Mesendoderm cultured cells (H1 derived)                  | Mesendoderm-DS18732        | 219,571 | 18 |
| Mesendoderm cultured cells (H1 derived)                  | Mesendoderm-DS19310        | 258,507 | 21 |
| Monocytes                                                | CD14-DS16508               | 212,246 | 22 |

|                                                 |                             |         |    |
|-------------------------------------------------|-----------------------------|---------|----|
| Monocytes                                       | CD14-DS17215                | 154,784 | 18 |
| Monocytes                                       | CD14-DS17391                | 125,230 | 16 |
| Monocytes                                       | CD14-DS17889                | 140,861 | 17 |
| Monocytes                                       | CD14-DS18065                | 169,326 | 17 |
| Neuronal progenitor cultured cells (H1 derived) | NPC-DS18739                 | 139,124 | 6  |
| Neuronal progenitor cultured cells (H1 derived) | NPC-DS20153                 | 176,242 | 16 |
| NK cells                                        | CD56-DS16376                | 139,295 | 26 |
| NK cells                                        | CD56-DS17189                | 128,883 | 23 |
| NK cells                                        | CD56-DS17443                | 108,784 | 19 |
| Non-pigment ciliary epithelial cells            | HNPCEpiC-DS12467            | 269,225 | 17 |
| Non-pigment ciliary epithelial cells            | HNPCEpiC-DS12471            | 222,945 | 9  |
| Ovary tissue                                    | Ovary-DS20827               | 194,588 | 19 |
| Pancreas tissue                                 | Pancreas-DS20753            | 189,361 | 13 |
| Pancreas tissue                                 | Pancreas-DS20842            | 200,172 | 12 |
| Periodontal ligament fibroblasts                | HPdLF-DS13569               | 202,167 | 13 |
| Periodontal ligament fibroblasts                | HPdLF-DS13573               | 220,015 | 12 |
| Pulmonary artery endothelial cells              | HPAEC-DS12916               | 158,790 | 6  |
| Pulmonary artery fibroblasts                    | HPAF-DS13411                | 240,676 | 14 |
| Pulmonary artery fibroblasts                    | HPAF-DS13416                | 214,416 | 10 |
| Renal endothelial cells                         | HRGEC-DS13705               | 182,281 | 11 |
| Renal endothelial cells                         | HRGEC-DS13716               | 178,855 | 8  |
| Renal epithelial cells                          | HRCE-DS10662                | 234,883 | 16 |
| Renal epithelial cells                          | HRCE-DS10666                | 244,571 | 17 |
| Renal epithelial cells                          | HRE-DS10631                 | 228,830 | 15 |
| Renal epithelial cells                          | HRE-DS10641                 | 240,528 | 11 |
| Renal proximal tubule epithelial cells          | RPTEC-DS14061               | 215,927 | 13 |
| Renal proximal tubule epithelial cells          | RPTEC-DS14065               | 225,128 | 17 |
| Retinal pigment epithelial cells                | HRPEpiC-DS12568             | 256,447 | 12 |
| Retinal pigment epithelial cells                | HRPEpiC-DS12583             | 282,843 | 12 |
| Skeletal muscle cells                           | HSMM_D-DS15538              | 310,296 | 18 |
| Skeletal muscle cells                           | HSMM_D-DS15542              | 285,704 | 17 |
| Skeletal muscle cells                           | HSMM-DS14426                | 287,942 | 14 |
| Skeletal muscle cells                           | HSMM-DS14430                | 285,572 | 17 |
| Skeletal muscle cells                           | Psoas_Muscle-DS20325        | 203,485 | 12 |
| Skeletal muscle cells                           | SKMC-DS11939                | 265,175 | 15 |
| Skeletal muscle cells                           | SKMC-DS11949                | 262,686 | 16 |
| Skeletal muscle cells                           | wgEncodeOpenChromDnaseHsmm  | 205,571 | 18 |
| Skeletal muscle cells                           | wgEncodeOpenChromDnaseHsmtt | 223,138 | 32 |
| Skin fibroblasts                                | AG10803-DS12374             | 232,609 | 12 |
| Skin fibroblasts                                | AG10803-DS12384             | 220,125 | 9  |
| Skin fibroblasts                                | BJ-DS10018                  | 218,577 | 12 |
| Skin fibroblasts                                | BJ-DS10081                  | 210,687 | 11 |
| Skin fibroblasts                                | HFF_MyC-DS15073             | 187,004 | 10 |
| Skin fibroblasts                                | HFF_MyC-DS15079             | 269,783 | 16 |
| Skin fibroblasts                                | HFF-DS15115                 | 247,544 | 11 |
| Skin fibroblasts                                | HFF-DS15119                 | 228,514 | 10 |
| Skin fibroblasts                                | Skin_Fibroblasts-DS18224    | 321,715 | 21 |
| Skin fibroblasts                                | Skin_Fibroblasts-DS18229    | 289,323 | 15 |
| Skin fibroblasts                                | Skin_Fibroblasts-DS18252    | 273,885 | 13 |
| Skin fibroblasts                                | Skin_Fibroblasts-DS18256    | 261,980 | 13 |
| Skin keratinocytes                              | Skin_Keratinocytes-DS18692  | 259,688 | 19 |
| Skin keratinocytes                              | Skin_Keratinocytes-DS18695  | 248,115 | 17 |
| Skin keratinocytes                              | Skin_Keratinocytes-DS18714  | 233,019 | 18 |
| Skin keratinocytes                              | Skin_Keratinocytes-DS18718  | 243,192 | 17 |
| Skin melanocytes                                | Skin_Melanocytes-DS18590    | 217,187 | 13 |
| Skin melanocytes                                | Skin_Melanocytes-DS18601    | 237,348 | 11 |
| Skin melanocytes                                | Skin_Melanocytes-DS18668    | 203,004 | 11 |
| Skin melanocytes                                | Skin_Melanocytes-DS19662    | 179,179 | 11 |
| Small airway epithelial cells                   | SAEC-DS10514                | 217,922 | 18 |
| Small airway epithelial cells                   | SAEC-DS10518                | 246,080 | 20 |
| Small bowel mucosa                              | Small_Bowel_Mucosa-DS20770  | 205,217 | 15 |
| T <sub>H</sub> 1 cells                          | Adult_Th1                   | 341,158 | 36 |
| T <sub>H</sub> 1 cells                          | hTH1-DS17592                | 104,516 | 21 |
| T <sub>H</sub> 1 cells                          | hTH1-DS17593                | 150,368 | 36 |
| T <sub>H</sub> 1 cells                          | hTH1-DS18015                | 138,928 | 34 |
| T <sub>H</sub> 1 cells                          | hTH1-DS7840                 | 112,168 | 26 |
| T <sub>H</sub> 1 cells                          | iTH1-DS18018                | 163,381 | 32 |
| T <sub>H</sub> 17 cells                         | hTH17-DS11039               | 99,336  | 24 |

|                                          |                             |         |    |
|------------------------------------------|-----------------------------|---------|----|
| T <sub>H</sub> 2 cells                   | hTH2-DS17597                | 158,083 | 26 |
| T <sub>H</sub> 2 cells                   | hTH2-DS18057                | 130,479 | 23 |
| T <sub>H</sub> 2 cells                   | hTH2-DS7842                 | 120,910 | 13 |
| T <sub>H</sub> 2 cells                   | iTH2-DS17603                | 163,261 | 31 |
| Toe fibroblasts                          | AG09309-DS12352             | 256,326 | 16 |
| Toe fibroblasts                          | AG09309-DS12357             | 211,656 | 12 |
| T <sub>REG</sub> cells                   | hTR-DS14702                 | 157,354 | 26 |
| T <sub>REG</sub> cells                   | hTR-DS17589                 | 200,402 | 30 |
| Trophoblast cultured cells (H1 derived)  | Trophoblast-DS18736         | 156,571 | 7  |
| Trophoblast cultured cells (H1 derived)  | Trophoblast-DS19317         | 178,923 | 11 |
| Umbilical vein endothelial cells (HUVEC) | HUVEC-DS10060               | 157,032 | 10 |
| Umbilical vein endothelial cells (HUVEC) | HUVEC-DS13475               | 172,355 | 6  |
| Umbilical vein endothelial cells (HUVEC) | wgEncodeOpenChromDnaseHuvec | 190,575 | 14 |
| Villous mesenchymal fibroblast cells     | HVMF-DS13977                | 234,481 | 16 |
| Villous mesenchymal fibroblast cells     | HVMF-DS13981                | 221,750 | 14 |

---

|                      |                   |         |    |
|----------------------|-------------------|---------|----|
| Fetal adrenal tissue | fAdrenal-DS12528  | 239,260 | 16 |
| Fetal adrenal tissue | fAdrenal-DS15123  | 237,417 | 13 |
| Fetal adrenal tissue | fAdrenal-DS17319  | 188,785 | 6  |
| Fetal adrenal tissue | fAdrenal-DS17677  | 171,942 | 12 |
| Fetal adrenal tissue | fAdrenal-DS19395  | 204,599 | 11 |
| Fetal adrenal tissue | fAdrenal-DS19583  | 227,942 | 12 |
| Fetal adrenal tissue | fAdrenal-DS20343  | 248,414 | 22 |
| Fetal brain tissue   | fBrain-DS11872    | 224,908 | 21 |
| Fetal brain tissue   | fBrain-DS11877    | 233,453 | 21 |
| Fetal brain tissue   | fBrain-DS14464    | 242,866 | 21 |
| Fetal brain tissue   | fBrain-DS14717    | 254,590 | 6  |
| Fetal brain tissue   | fBrain-DS14718    | 237,507 | 7  |
| Fetal brain tissue   | fBrain-DS14803    | 217,868 | 17 |
| Fetal brain tissue   | fBrain-DS14815    | 221,266 | 14 |
| Fetal brain tissue   | fBrain-DS15453    | 244,347 | 15 |
| Fetal brain tissue   | fBrain-DS16302    | 212,268 | 12 |
| Fetal brain tissue   | fBrain-DS20221    | 269,189 | 6  |
| Fetal brain tissue   | fBrain-DS20226    | 235,312 | 19 |
| Fetal brain tissue   | fBrain-DS20231    | 221,164 | 17 |
| Fetal brain tissue   | fBrain-DS20780    | 254,310 | 17 |
| Fetal fibroblasts    | AG04449-DS12319   | 214,387 | 9  |
| Fetal fibroblasts    | AG04449-DS12329   | 212,307 | 13 |
| Fetal heart tissue   | fHeart-DS12531    | 225,000 | 6  |
| Fetal heart tissue   | fHeart-DS12810    | 271,123 | 9  |
| Fetal heart tissue   | fHeart-DS15643    | 208,559 | 6  |
| Fetal heart tissue   | fHeart-DS15839    | 269,385 | 11 |
| Fetal heart tissue   | fHeart-DS16018    | 228,562 | 4  |
| Fetal heart tissue   | fHeart-DS16146    | 235,849 | 6  |
| Fetal heart tissue   | fHeart-DS16500    | 245,587 | 6  |
| Fetal heart tissue   | fHeart-DS16582    | 247,095 | 8  |
| Fetal heart tissue   | fHeart-DS16621    | 233,123 | 7  |
| Fetal heart tissue   | fHeart-DS16819    | 278,526 | 10 |
| Fetal heart tissue   | fHeart-DS19427    | 278,026 | 13 |
| Fetal heart tissue   | fHeart-DS19431    | 259,866 | 8  |
| Fetal kidney tissue  | fKidney_L-DS16446 | 237,076 | 10 |
| Fetal kidney tissue  | fKidney_L-DS16579 | 261,475 | 10 |
| Fetal kidney tissue  | fKidney_L-DS16805 | 290,524 | 13 |
| Fetal kidney tissue  | fKidney_L-DS17140 | 227,089 | 9  |
| Fetal kidney tissue  | fKidney_L-DS18466 | 256,181 | 10 |
| Fetal kidney tissue  | fKidney_L-DS20920 | 312,502 | 11 |
| Fetal kidney tissue  | fKidney_L-DS20953 | 307,412 | 8  |
| Fetal kidney tissue  | fKidney_L-DS21344 | 267,940 | 11 |
| Fetal kidney tissue  | fKidney_R-DS15651 | 265,765 | 14 |
| Fetal kidney tissue  | fKidney_R-DS16441 | 254,362 | 8  |
| Fetal kidney tissue  | fKidney_R-DS16801 | 292,195 | 10 |
| Fetal kidney tissue  | fKidney_R-DS17144 | 235,190 | 7  |
| Fetal kidney tissue  | fKidney_R-DS18463 | 243,750 | 12 |
| Fetal kidney tissue  | fKidney_R-DS20917 | 283,050 | 11 |
| Fetal kidney tissue  | fKidney_R-DS20951 | 277,275 | 10 |
| Fetal kidney tissue  | fKidney_R-DS21044 | 216,284 | 6  |
| Fetal kidney tissue  | fKidney_R-DS21340 | 270,388 | 14 |

|                              |                       |         |    |
|------------------------------|-----------------------|---------|----|
| Fetal kidney tissue          | fKidney-DS10986       | 266,759 | 7  |
| Fetal kidney tissue          | fKidney-DS12635       | 225,491 | 7  |
| Fetal kidney tissue          | fKidney-DS16139       | 281,020 | 11 |
| Fetal kidney tissue          | fKidney-DS16837       | 241,597 | 15 |
| Fetal kidney tissue          | fKidney-DS17068       | 235,705 | 10 |
| Fetal kidney tissue          | fKidney-DS17522       | 289,955 | 13 |
| Fetal kidney tissue          | fKidney-DS17753       | 219,447 | 8  |
| Fetal kidney tissue          | fKidney-DS20564       | 246,375 | 7  |
| Fetal kidney tissue          | fKidney-DS20786       | 275,125 | 6  |
| Fetal kidney tissue          | fKidney-DS20987       | 227,064 | 8  |
| Fetal kidney tissue          | fKidney-DS20988       | 259,876 | 9  |
| Fetal kidney tissue          | fKidney-DS21096       | 311,948 | 15 |
| Fetal large intestine tissue | flntestine_Lg-DS16027 | 199,028 | 14 |
| Fetal large intestine tissue | flntestine_Lg-DS16164 | 217,553 | 18 |
| Fetal large intestine tissue | flntestine_Lg-DS16563 | 229,851 | 19 |
| Fetal large intestine tissue | flntestine_Lg-DS17094 | 229,118 | 23 |
| Fetal large intestine tissue | flntestine_Lg-DS17157 | 216,931 | 15 |
| Fetal large intestine tissue | flntestine_Lg-DS17313 | 114,101 | 11 |
| Fetal large intestine tissue | flntestine_Lg-DS17422 | 193,211 | 15 |
| Fetal large intestine tissue | flntestine_Lg-DS17462 | 222,892 | 19 |
| Fetal large intestine tissue | flntestine_Lg-DS17502 | 111,613 | 11 |
| Fetal large intestine tissue | flntestine_Lg-DS17647 | 237,118 | 19 |
| Fetal large intestine tissue | flntestine_Lg-DS17748 | 200,602 | 15 |
| Fetal large intestine tissue | flntestine_Lg-DS17785 | 216,036 | 17 |
| Fetal large intestine tissue | flntestine_Lg-DS17841 | 358,040 | 32 |
| Fetal large intestine tissue | flntestine_Lg-DS17990 | 245,075 | 16 |
| Fetal large intestine tissue | flntestine_Lg-DS18499 | 228,192 | 20 |
| Fetal lung fibroblasts       | AG04450-DS12255       | 201,391 | 10 |
| Fetal lung fibroblasts       | AG04450-DS12270       | 192,559 | 12 |
| Fetal lung fibroblasts       | WI_38_TAM-DS14323     | 258,089 | 14 |
| Fetal lung fibroblasts       | WI_38_TAM-DS14328     | 212,246 | 11 |
| Fetal lung fibroblasts       | WI_38-DS14315         | 212,805 | 10 |
| Fetal lung fibroblasts       | WI_38-DS14320         | 188,762 | 9  |
| Fetal lung tissue            | fLung_L-DS15637       | 250,704 | 14 |
| Fetal lung tissue            | fLung_L-DS16570       | 249,920 | 17 |
| Fetal lung tissue            | fLung_L-DS17105       | 249,830 | 18 |
| Fetal lung tissue            | fLung_L-DS17154       | 272,229 | 18 |
| Fetal lung tissue            | fLung_L-DS17464       | 251,021 | 16 |
| Fetal lung tissue            | fLung_L-DS17674       | 256,668 | 19 |
| Fetal lung tissue            | fLung_L-DS17739       | 231,938 | 13 |
| Fetal lung tissue            | fLung_L-DS17835       | 202,511 | 12 |
| Fetal lung tissue            | fLung_L-DS17959       | 246,599 | 17 |
| Fetal lung tissue            | fLung_L-DS18170       | 298,414 | 18 |
| Fetal lung tissue            | fLung_L-DS18421       | 262,423 | 17 |
| Fetal lung tissue            | fLung_L-DS18487       | 278,850 | 18 |
| Fetal lung tissue            | fLung_L-DS21334       | 244,734 | 19 |
| Fetal lung tissue            | fLung_R-DS15632       | 224,177 | 18 |
| Fetal lung tissue            | fLung_R-DS16566       | 241,400 | 20 |
| Fetal lung tissue            | fLung_R-DS16790       | 270,372 | 21 |
| Fetal lung tissue            | fLung_R-DS17101       | 252,769 | 16 |
| Fetal lung tissue            | fLung_R-DS17162       | 236,762 | 15 |
| Fetal lung tissue            | fLung_R-DS17670       | 288,965 | 15 |
| Fetal lung tissue            | fLung_R-DS17831       | 285,265 | 20 |
| Fetal lung tissue            | fLung_R-DS17954       | 264,896 | 16 |
| Fetal lung tissue            | fLung_R-DS18418       | 263,746 | 18 |
| Fetal lung tissue            | fLung_R-DS18492       | 276,689 | 15 |
| Fetal lung tissue            | fLung_R-DS21328       | 262,453 | 14 |
| Fetal lung tissue            | fLung-DS12646         | 208,762 | 13 |
| Fetal lung tissue            | fLung-DS12817         | 287,861 | 18 |
| Fetal lung tissue            | fLung-DS13507         | 264,039 | 21 |
| Fetal lung tissue            | fLung-DS13985         | 260,023 | 23 |
| Fetal lung tissue            | fLung-DS14666         | 221,321 | 12 |
| Fetal lung tissue            | fLung-DS14724         | 270,963 | 16 |
| Fetal lung tissue            | fLung-DS14751         | 263,458 | 16 |
| Fetal lung tissue            | fLung-DS14809         | 210,774 | 14 |
| Fetal lung tissue            | fLung-DS14820         | 234,213 | 16 |
| Fetal lung tissue            | fLung-DS15227         | 228,533 | 18 |
| Fetal lung tissue            | fLung-DS15461         | 264,761 | 20 |

|                     |                                |         |    |
|---------------------|--------------------------------|---------|----|
| Fetal lung tissue   | fLung-DS15573                  | 234,527 | 10 |
| Fetal muscle tissue | fMuscle_arm-DS17432            | 262,089 | 17 |
| Fetal muscle tissue | fMuscle_arm-DS17765            | 406,263 | 21 |
| Fetal muscle tissue | fMuscle_arm-DS17825            | 266,958 | 12 |
| Fetal muscle tissue | fMuscle_arm-DS17848            | 267,476 | 15 |
| Fetal muscle tissue | fMuscle_arm-DS18080            | 306,683 | 19 |
| Fetal muscle tissue | fMuscle_arm-DS18176            | 238,043 | 18 |
| Fetal muscle tissue | fMuscle_arm-DS18379            | 192,450 | 11 |
| Fetal muscle tissue | fMuscle_arm-DS18452            | 239,163 | 16 |
| Fetal muscle tissue | fMuscle_arm-DS18473            | 236,430 | 15 |
| Fetal muscle tissue | fMuscle_arm-DS18559            | 238,326 | 16 |
| Fetal muscle tissue | fMuscle_arm-DS18992            | 199,180 | 17 |
| Fetal muscle tissue | fMuscle_arm-DS19051            | 205,604 | 15 |
| Fetal muscle tissue | fMuscle_arm-DS19053            | 224,777 | 14 |
| Fetal muscle tissue | fMuscle_arm-DS19270            | 254,472 | 18 |
| Fetal muscle tissue | fMuscle_arm-DS19295            | 261,040 | 16 |
| Fetal muscle tissue | fMuscle_arm-DS19380            | 262,039 | 12 |
| Fetal muscle tissue | fMuscle_arm-DS19439            | 188,681 | 14 |
| Fetal muscle tissue | fMuscle_arm-DS19646            | 224,368 | 13 |
| Fetal muscle tissue | fMuscle_back-DS17767           | 304,941 | 19 |
| Fetal muscle tissue | fMuscle_back-DS17850           | 286,323 | 15 |
| Fetal muscle tissue | fMuscle_back-DS18083           | 315,067 | 19 |
| Fetal muscle tissue | fMuscle_back-DS18377           | 223,390 | 13 |
| Fetal muscle tissue | fMuscle_back-DS18454           | 257,441 | 13 |
| Fetal muscle tissue | fMuscle_back-DS18468           | 258,750 | 14 |
| Fetal muscle tissue | fMuscle_back-DS18842           | 240,033 | 14 |
| Fetal muscle tissue | fMuscle_back-DS19117           | 206,932 | 16 |
| Fetal muscle tissue | fMuscle_back-DS19384           | 270,166 | 9  |
| Fetal muscle tissue | fMuscle_back-DS19441           | 247,335 | 13 |
| Fetal muscle tissue | fMuscle_back-DS19648           | 318,211 | 13 |
| Fetal muscle tissue | fMuscle_back-DS20244           | 243,554 | 12 |
| Fetal muscle tissue | fMuscle_back-DS20789           | 250,916 | 14 |
| Fetal muscle tissue | fMuscle_back-DS21048           | 235,973 | 12 |
| Fetal muscle tissue | fMuscle_leg-DS17429            | 249,673 | 15 |
| Fetal muscle tissue | fMuscle_leg-DS18386            | 251,317 | 11 |
| Fetal muscle tissue | fMuscle_leg-DS18456            | 236,671 | 12 |
| Fetal muscle tissue | fMuscle_leg-DS18471            | 259,785 | 14 |
| Fetal muscle tissue | fMuscle_leg-DS18844            | 181,791 | 9  |
| Fetal muscle tissue | fMuscle_leg-DS19115            | 244,480 | 14 |
| Fetal muscle tissue | fMuscle_leg-DS19158            | 263,781 | 17 |
| Fetal muscle tissue | fMuscle_leg-DS19272            | 277,079 | 13 |
| Fetal muscle tissue | fMuscle_leg-DS19291            | 270,313 | 14 |
| Fetal muscle tissue | fMuscle_leg-DS19382            | 222,200 | 10 |
| Fetal muscle tissue | fMuscle_leg-DS19436            | 270,484 | 15 |
| Fetal muscle tissue | fMuscle_leg-DS19643            | 264,525 | 14 |
| Fetal muscle tissue | fMuscle_leg-DS20239            | 288,372 | 12 |
| Fetal muscle tissue | fMuscle_leg-DS20797            | 260,053 | 14 |
| Fetal muscle tissue | fMuscle_lower_limb-DS18174     | 332,489 | 24 |
| Fetal muscle tissue | fMuscle_trunk-DS17827          | 270,215 | 16 |
| Fetal muscle tissue | fMuscle_trunk-DS20242          | 261,643 | 17 |
| Fetal muscle tissue | fMuscle_trunk-DS20544          | 242,440 | 15 |
| Fetal muscle tissue | fMuscle_upper_back-DS19283     | 218,423 | 16 |
| Fetal muscle tissue | fMuscle_upper_limb_sk-DS17661  | 231,931 | 17 |
| Fetal muscle tissue | fMuscle_upper_trunk-DS17664    | 276,446 | 19 |
| Fetal ovary         | fOvary-DS17445                 | 175,291 | 17 |
| Fetal placenta      | fPlacenta-DS17639              | 287,200 | 27 |
| Fetal placenta      | fPlacenta-DS17744              | 228,065 | 20 |
| Fetal placenta      | fPlacenta-DS19391              | 240,708 | 26 |
| Fetal placenta      | fPlacenta-DS20346              | 225,737 | 24 |
| Fetal placenta      | fPlacenta-DS20793              | 257,034 | 27 |
| Fetal placenta      | fPlacenta-DS21111              | 277,837 | 21 |
| Fetal renal cortex  | fKidney_renal_cortex_L-DS17550 | 260,167 | 11 |
| Fetal renal cortex  | fKidney_renal_cortex_L-DS18542 | 269,183 | 9  |
| Fetal renal cortex  | fKidney_renal_cortex_L-DS18931 | 220,018 | 10 |
| Fetal renal cortex  | fKidney_renal_cortex_L-DS19257 | 301,966 | 11 |
| Fetal renal cortex  | fKidney_renal_cortex_R-DS17545 | 253,847 | 11 |
| Fetal renal cortex  | fKidney_renal_cortex_R-DS18928 | 246,280 | 8  |
| Fetal renal cortex  | fKidney_renal_cortex_R-DS19254 | 282,614 | 9  |

|                              |                                |         |    |
|------------------------------|--------------------------------|---------|----|
| Fetal renal cortex           | fKidney_renal_cortex-DS17307   | 175,158 | 10 |
| Fetal renal cortex           | fKidney_renal_cortex-DS17387   | 270,509 | 9  |
| Fetal renal cortex           | fKidney_renal_cortex-DS17455   | 319,483 | 10 |
| Fetal renal cortex           | fKidney_renal_cortex-DS17756   | 220,328 | 8  |
| Fetal renal cortex           | fKidney_renal_cortex-DS17804   | 274,440 | 7  |
| Fetal renal cortex           | fKidney_renal_cortex-DS18428   | 247,676 | 9  |
| Fetal renal cortex           | fKidney_renal_cortex-DS19388   | 239,419 | 10 |
| Fetal renal cortex           | fKidney_renal_cortex-DS20018   | 240,500 | 7  |
| Fetal renal cortex           | fKidney_renal_cortex-DS20024   | 263,619 | 8  |
| Fetal renal cortex           | fKidney_renal_cortex-DS20445   | 294,348 | 9  |
| Fetal renal cortex           | fKidney_renal_cortex-DS20568   | 298,780 | 10 |
| Fetal renal pelvis           | fKidney_renal_pelvis_L-DS17553 | 253,084 | 7  |
| Fetal renal pelvis           | fKidney_renal_pelvis_L-DS18666 | 240,616 | 8  |
| Fetal renal pelvis           | fKidney_renal_pelvis_L-DS18964 | 232,285 | 10 |
| Fetal renal pelvis           | fKidney_renal_pelvis_L-DS19238 | 270,193 | 8  |
| Fetal renal pelvis           | fKidney_renal_pelvis_R-DS17548 | 243,133 | 5  |
| Fetal renal pelvis           | fKidney_renal_pelvis_R-DS18663 | 282,071 | 10 |
| Fetal renal pelvis           | fKidney_renal_pelvis_R-DS18961 | 239,379 | 7  |
| Fetal renal pelvis           | fKidney_renal_pelvis_R-DS19235 | 246,156 | 9  |
| Fetal renal pelvis           | fKidney_renal_pelvis-DS17381   | 288,643 | 9  |
| Fetal renal pelvis           | fKidney_renal_pelvis-DS17451   | 261,684 | 13 |
| Fetal renal pelvis           | fKidney_renal_pelvis-DS17760   | 260,905 | 12 |
| Fetal renal pelvis           | fKidney_renal_pelvis-DS18088   | 169,948 | 6  |
| Fetal renal pelvis           | fKidney_renal_pelvis-DS18431   | 234,406 | 11 |
| Fetal renal pelvis           | fKidney_renal_pelvis-DS19386   | 258,071 | 8  |
| Fetal renal pelvis           | fKidney_renal_pelvis-DS20022   | 286,362 | 11 |
| Fetal renal pelvis           | fKidney_renal_pelvis-DS20027   | 233,092 | 7  |
| Fetal renal pelvis           | fKidney_renal_pelvis-DS20448   | 322,488 | 11 |
| Fetal renal pelvis           | fKidney_renal_pelvis-DS20570   | 297,997 | 13 |
| Fetal skin                   | fSkin-DS10987                  | 220,690 | 9  |
| Fetal skin fibroblasts       | fSkin_fibro_abdomen-DS19558    | 218,329 | 8  |
| Fetal skin fibroblasts       | fSkin_fibro_abdomen-DS19561    | 236,795 | 7  |
| Fetal skin fibroblasts       | fSkin_fibro_back-DS19174       | 219,997 | 15 |
| Fetal skin fibroblasts       | fSkin_fibro_back-DS19233       | 225,696 | 15 |
| Fetal skin fibroblasts       | fSkin_fibro_bicep_L-DS19857    | 222,207 | 9  |
| Fetal skin fibroblasts       | fSkin_fibro_bicep_L-DS19867    | 217,057 | 10 |
| Fetal skin fibroblasts       | fSkin_fibro_bicep_R-DS19745    | 216,446 | 8  |
| Fetal skin fibroblasts       | fSkin_fibro_bicep_R-DS19761    | 222,332 | 8  |
| Fetal skin fibroblasts       | fSkin_fibro_leg_L_quad-DS20046 | 247,329 | 11 |
| Fetal skin fibroblasts       | fSkin_fibro_leg_L_quad-DS20056 | 243,893 | 10 |
| Fetal skin fibroblasts       | fSkin_fibro_leg_R_quad-DS19943 | 211,007 | 10 |
| Fetal skin fibroblasts       | fSkin_fibro_leg_R_quad-DS19948 | 235,371 | 10 |
| Fetal skin fibroblasts       | fSkin_fibro_scalp-DS19444      | 215,217 | 12 |
| Fetal skin fibroblasts       | fSkin_fibro_scalp-DS19449      | 219,626 | 11 |
| Fetal skin fibroblasts       | fSkin_fibro_upper_back-DS19696 | 228,230 | 14 |
| Fetal skin fibroblasts       | fSkin_fibro_upper_back-DS19706 | 263,171 | 11 |
| Fetal small intestine tissue | fIntestine_Sm-DS16559          | 241,735 | 18 |
| Fetal small intestine tissue | fIntestine_Sm-DS16712          | 178,934 | 16 |
| Fetal small intestine tissue | fIntestine_Sm-DS16822          | 250,946 | 16 |
| Fetal small intestine tissue | fIntestine_Sm-DS16975          | 222,123 | 16 |
| Fetal small intestine tissue | fIntestine_Sm-DS17092          | 223,170 | 19 |
| Fetal small intestine tissue | fIntestine_Sm-DS17150          | 210,436 | 14 |
| Fetal small intestine tissue | fIntestine_Sm-DS17317          | 196,775 | 23 |
| Fetal small intestine tissue | fIntestine_Sm-DS17425          | 121,891 | 12 |
| Fetal small intestine tissue | fIntestine_Sm-DS17643          | 228,567 | 14 |
| Fetal small intestine tissue | fIntestine_Sm-DS17763          | 228,689 | 23 |
| Fetal small intestine tissue | fIntestine_Sm-DS17808          | 242,145 | 18 |
| Fetal small intestine tissue | fIntestine_Sm-DS17844          | 237,577 | 14 |
| Fetal small intestine tissue | fIntestine_Sm-DS18495          | 217,807 | 19 |
| Fetal spinal cord            | fSpinal_cord-DS18501           | 292,271 | 5  |
| Fetal spinal cord            | fSpinal_cord-DS19260           | 221,443 | 10 |
| Fetal spinal cord            | fSpinal_cord-DS20351           | 262,720 | 16 |
| Fetal spinal cord            | fSpinal_cord-DS20530           | 245,437 | 12 |
| Fetal spinal cord            | fSpinal_cord-DS20956           | 215,266 | 9  |
| Fetal spleen                 | fSpleen-DS17448                | 227,282 | 16 |
| Fetal stomach                | fStomach-DS16530               | 206,921 | 16 |
| Fetal stomach                | fStomach-DS17172               | 217,031 | 13 |
| Fetal stomach                | fStomach-DS17325               | 142,757 | 11 |

|               |                  |         |    |
|---------------|------------------|---------|----|
| Fetal stomach | fStomach-DS17659 | 223,240 | 16 |
| Fetal stomach | fStomach-DS17750 | 177,536 | 13 |
| Fetal stomach | fStomach-DS17878 | 270,050 | 19 |
| Fetal stomach | fStomach-DS17963 | 220,227 | 16 |
| Fetal stomach | fStomach-DS18389 | 192,936 | 15 |
| Fetal stomach | fStomach-DS18821 | 215,802 | 11 |
| Fetal stomach | fStomach-DS19933 | 241,276 | 21 |
| Fetal stomach | fStomach-DS20079 | 243,537 | 11 |
| Fetal stomach | fStomach-DS20349 | 233,102 | 14 |
| Fetal stomach | fStomach-DS20546 | 236,515 | 20 |
| Fetal stomach | fStomach-DS20791 | 211,415 | 14 |
| Fetal testes  | fTestes-DS18942  | 226,342 | 10 |
| Fetal testes  | fTestes-DS20170  | 231,064 | 11 |
| Fetal thymus  | fThymus-DS16490  | 171,022 | 43 |
| Fetal thymus  | fThymus-DS16841  | 150,724 | 28 |
| Fetal thymus  | fThymus-DS17323  | 144,746 | 38 |
| Fetal thymus  | fThymus-DS17474  | 148,201 | 40 |
| Fetal thymus  | fThymus-DS17875  | 145,658 | 41 |
| Fetal thymus  | fThymus-DS17876  | 190,176 | 46 |
| Fetal thymus  | fThymus-DS18382  | 203,865 | 43 |
| Fetal thymus  | fThymus-DS19287  | 196,719 | 8  |
| Fetal thymus  | fThymus-DS19675  | 164,434 | 58 |
| Fetal thymus  | fThymus-DS20335  | 144,632 | 49 |
| Fetal thymus  | fThymus-DS20341  | 153,966 | 41 |

---

|           |                              |         |    |
|-----------|------------------------------|---------|----|
| A549      | A549-DS14285                 | 173,554 | 13 |
| A549      | A549-DS14289                 | 153,968 | 7  |
| A549      | wgEncodeOpenChromDnaseA549   | 160,688 | 9  |
| BE2C      | BE2_C-DS14625                | 218,560 | 8  |
| BE2C      | BE2_C-DS14635                | 220,932 | 12 |
| CACO2     | CACO2-DS8235                 | 156,653 | 19 |
| CACO2     | CACO2-DS8416                 | 140,069 | 18 |
| CMK       | CMK-DS12393                  | 167,379 | 4  |
| HCT116    | HCT116-DS13547               | 144,714 | 14 |
| HCT116    | HCT116-DS13551               | 144,611 | 13 |
| HEK293T   | HEK293T-DS13691              | 80,885  | 4  |
| HEK293T   | HEK293T-DS13696              | 95,566  | 10 |
| HELA      | Hela-DS10011                 | 159,166 | 15 |
| HELA      | Hela-DS8200                  | 171,190 | 13 |
| HELA      | wgEncodeOpenChromDnaseHela3  | 181,921 | 19 |
| HEPG2     | HEPG2-DS7764                 | 118,570 | 10 |
| HEPG2     | HEPG2-DS7768                 | 114,100 | 8  |
| HEPG2     | wgEncodeOpenChromDnaseHepg2  | 214,138 | 17 |
| HESC      | H1_P18-DS18873               | 223,271 | 27 |
| HESC      | H1_P18-DS19100               | 153,095 | 16 |
| HESC      | H7_hESC_T14-DS11814          | 163,882 | 7  |
| HESC      | H7_hESC_T14-DS12147          | 181,918 | 12 |
| HESC      | H7_hESC_T2-DS14732           | 208,630 | 8  |
| HESC      | H7_hESC_T5-DS11953           | 231,087 | 15 |
| HESC      | H7_hESC_T5-DS15665           | 263,665 | 18 |
| HESC      | H7_hESC_T9-DS15809           | 245,145 | 13 |
| HESC      | H9_P42-DS18517               | 216,783 | 17 |
| HESC      | H9_P42-DS18522               | 183,643 | 17 |
| HESC      | HESC-DS10167                 | 192,966 | 23 |
| HESC      | hESCT0-DS11909               | 326,539 | 25 |
| HESC      | hESCT0-DS13133               | 265,127 | 23 |
| HESC      | wgEncodeOpenChromDnaseH1hesc | 232,751 | 33 |
| HL60      | HL60-DS11733                 | 178,032 | 20 |
| HL60      | HL60-DS11809                 | 199,270 | 17 |
| IMR90     | IMR90-DS11759                | 194,623 | 16 |
| IMR90     | IMR90-DS11764                | 189,784 | 17 |
| IMR90     | IMR90-DS13219                | 253,026 | 14 |
| IMR90     | IMR90-DS13229                | 220,322 | 16 |
| IPS cells | iPS_19_11-DS15153            | 243,074 | 24 |
| IPS cells | iPS_19_7-DS15148             | 215,493 | 20 |
| IPS cells | iPS_4_7-DS15169              | 219,356 | 23 |
| IPS cells | iPS_6_9-DS15164              | 220,747 | 24 |

|          |                               |         |    |
|----------|-------------------------------|---------|----|
| JURKAT   | Jurkat-DS10681                | 152,255 | 28 |
| JURKAT   | Jurkat-DS12659                | 194,089 | 34 |
| K562     | K562-DS13204                  | 210,649 | 20 |
| K562     | K562-DS13209                  | 181,217 | 18 |
| K562     | K562-DS13277                  | 178,134 | 15 |
| K562     | K562-DS13282                  | 181,433 | 10 |
| K562     | K562-DS13287                  | 203,857 | 12 |
| K562     | K562-DS13310                  | 164,618 | 22 |
| K562     | K562-DS13906                  | 172,247 | 15 |
| K562     | K562-DS14211                  | 187,634 | 21 |
| K562     | K562-DS14216                  | 183,276 | 18 |
| K562     | K562-DS14245                  | 178,075 | 16 |
| K562     | K562-DS14250                  | 183,028 | 16 |
| K562     | K562-DS14274                  | 176,224 | 16 |
| K562     | K562-DS14279                  | 194,682 | 17 |
| K562     | K562-DS15309                  | 207,854 | 21 |
| K562     | K562-DS15358                  | 191,890 | 12 |
| K562     | K562-DS15363                  | 202,756 | 9  |
| K562     | K562-DS16924                  | 187,807 | 19 |
| K562     | K562-DS16934                  | 183,894 | 17 |
| K562     | K562-DS9764                   | 181,544 | 26 |
| K562     | K562-DS9767                   | 181,443 | 17 |
| K562     | wgEncodeOpenChromDnaseK562    | 153,438 | 14 |
| LCL      | GM06990-DS7748                | 121,937 | 20 |
| LCL      | GM06990-DS7784                | 118,460 | 15 |
| LCL      | GM12864-DS12431               | 173,730 | 28 |
| LCL      | GM12865-DS12436               | 179,926 | 24 |
| LCL      | GM12865-DS12442               | 186,974 | 33 |
| LCL      | GM12878-DS10671               | 150,916 | 20 |
| LCL      | GM12878-DS9432                | 150,282 | 22 |
| LCL      | wgEncodeOpenChromDnaseGm12878 | 168,844 | 24 |
| LHCNM2   | LHCN_M2_D4-DS20534            | 171,246 | 17 |
| LHCNM2   | LHCN_M2_D4-DS20647            | 270,156 | 18 |
| LHCNM2   | LHCN_M2-DS20485               | 244,218 | 15 |
| LHCNM2   | LHCN_M2-DS20548               | 241,195 | 14 |
| LNCAP    | LNCap-DS14680                 | 232,792 | 18 |
| LNCAP    | LNCap-DS14684                 | 219,666 | 22 |
| LNCAP    | wgEncodeOpenChromDnaseLncap   | 242,546 | 26 |
| M059J    | M059J-DS20493                 | 273,845 | 14 |
| M059J    | M059J-DS20497                 | 269,122 | 16 |
| MCF7     | MCF7_ER-DS18025               | 284,516 | 19 |
| MCF7     | MCF7_ER-DS18271               | 268,203 | 19 |
| MCF7     | MCF7-DS12619                  | 215,829 | 14 |
| MCF7     | MCF7-DS18021                  | 299,781 | 22 |
| MCF7     | MCF7-DS18267                  | 254,492 | 18 |
| MCF7     | MCF7-DS9445                   | 160,082 | 10 |
| MCF7     | wgEncodeOpenChromDnaseMcf7    | 181,064 | 14 |
| NB4      | NB4-DS12538                   | 170,045 | 13 |
| NB4      | NB4-DS12543                   | 180,983 | 13 |
| NT2      | NT2_D1-DS14564                | 184,600 | 11 |
| NT2      | NT2_D1-DS14575                | 228,165 | 14 |
| PANC1    | PANC1-DS9873                  | 150,811 | 6  |
| PANC1    | PANC1-DS9955                  | 151,327 | 8  |
| PrEC     | PrEC-DS12088                  | 200,143 | 20 |
| PrEC     | PrEC-DS12098                  | 209,654 | 20 |
| RPMI7951 | RPMI_7951-DS20904             | 207,826 | 6  |
| RPMI7951 | RPMI_7951-DS20909             | 212,669 | 8  |
| SKNMC    | SK_N_MC-DS14408               | 182,372 | 11 |
| SKNMC    | SK_N_MC-DS14413               | 187,234 | 10 |
| SKNSH    | SKNSH-DS8476                  | 147,479 | 6  |
| SKNSH    | SKNSH-DS8482                  | 118,678 | 4  |
| T47D     | T_47D-DS19790                 | 185,571 | 12 |
| T47D     | T_47D-DS19794                 | 188,392 | 14 |
| WERIRB   | WERI_Rb1-DS13670              | 226,821 | 15 |
| WERIRB   | WERI_Rb1-DS13681              | 228,592 | 16 |

\* Data sets were excluded from downstream analysis (see **Methods**).



\*\* *PTPN2* locus (extended to 140 kb): chr18: 12,760,001 - 12,900,000 (hg19).

**Table S3.** DNase hypersensitivity sites (DHS) in *PTPN2* locus in primary cell types, fetal tissues and cell lines; ordered by number of DHS in *PTPN2* locus.

| Cell type or tissue                                      | Frequency<br>(no. of data sets) | Average no. of<br>DHS genome-wide | Average no. of<br>DHS in <i>PTPN2</i> locus ** | DHS overlapping<br>with <i>PTPN2</i> SNPs |
|----------------------------------------------------------|---------------------------------|-----------------------------------|------------------------------------------------|-------------------------------------------|
| T <sub>H</sub> 1 cells                                   | 6                               | 168,420                           | 31                                             | 12                                        |
| T <sub>REG</sub> cells                                   | 2                               | 178,878                           | 28                                             | 4                                         |
| T <sub>H</sub> 17 cells                                  | 1                               | 99,336                            | 24                                             | 3                                         |
| T <sub>H</sub> 2 cells                                   | 4                               | 143,183                           | 23                                             | 5                                         |
| NK cells                                                 | 3                               | 125,654                           | 23                                             | 6                                         |
| Iris pigment epithelial cells                            | 2                               | 288,293                           | 23                                             | 2                                         |
| Brain vascular smooth muscle cells                       | 2                               | 207,986                           | 22                                             | 2                                         |
| Brain vascular pericytes                                 | 1                               | 264,939                           | 21                                             | 2                                         |
| Bronchial epithelial cells (BEC)                         | 2                               | 199,006                           | 21                                             | 1                                         |
| Esophageal epithelial cells                              | 2                               | 242,589                           | 21                                             | 1                                         |
| CD8 <sup>+</sup> T cells                                 | 5                               | 121,006                           | 20                                             | 6                                         |
| Mesendoderm cultured cells (H1 derived)                  | 2                               | 239,039                           | 20                                             | 4                                         |
| Amniotic epithelial cells                                | 2                               | 256,238                           | 19                                             | 2                                         |
| Ovary tissue                                             | 1                               | 194,588                           | 19                                             | 1                                         |
| Small airway epithelial cells                            | 2                               | 232,001                           | 19                                             | 1                                         |
| Mammary epithelial cells                                 | 5                               | 226,791                           | 18                                             | 8                                         |
| Monocytes                                                | 5                               | 160,489                           | 18                                             | 3                                         |
| Skin keratinocytes                                       | 4                               | 246,004                           | 18                                             | 1                                         |
| Skeletal muscle cells                                    | 9                               | 258,841                           | 18                                             | 9                                         |
| Choroid plexus epithelial cells                          | 2                               | 252,082                           | 18                                             | 2                                         |
| CD3 <sup>+</sup> T cells *                               | 6                               | 113,603                           | 17                                             | 5                                         |
| Gastric mucosa                                           | 2                               | 213,730                           | 17                                             | 2                                         |
| CD4 <sup>+</sup> primary T cells *                       | 6                               | 125,213                           | 16                                             | 5                                         |
| Cardiac fibroblasts                                      | 4                               | 224,800                           | 16                                             | 5                                         |
| CD4 <sup>+</sup> naïve T cells                           | 2                               | 108,724                           | 16                                             | 4                                         |
| B cells                                                  | 6                               | 140,422                           | 16                                             | 2                                         |
| Gingival fibroblasts                                     | 2                               | 187,461                           | 16                                             | 2                                         |
| Renal proximal tubule epithelial cells                   | 2                               | 220,528                           | 15                                             | 3                                         |
| Villous mesenchymal fibroblast cells                     | 2                               | 228,116                           | 15                                             | 2                                         |
| Small bowel mucosa                                       | 1                               | 205,217                           | 15                                             | 1                                         |
| Renal epithelial cells                                   | 4                               | 237,203                           | 15                                             | 1                                         |
| Epidermal keratinocytes                                  | 3                               | 192,573                           | 15                                             | 2                                         |
| Mesenchymal stem cells (H1 derived)                      | 4                               | 235,992                           | 14                                             | 3                                         |
| Toe fibroblasts                                          | 2                               | 233,991                           | 14                                             | 1                                         |
| Astrocytes                                               | 8                               | 230,892                           | 14                                             | 4                                         |
| Non-pigment ciliary epithelial cells                     | 2                               | 246,085                           | 13                                             | 3                                         |
| Skin fibroblasts                                         | 12                              | 246,812                           | 13                                             | 4                                         |
| CD34 <sup>+</sup> cells                                  | 17                              | 167,702                           | 13                                             | 2                                         |
| Cardiac myocytes                                         | 2                               | 229,441                           | 13                                             | 2                                         |
| Pancreas tissue                                          | 2                               | 194,767                           | 13                                             | 2                                         |
| Periodontal ligament fibroblasts                         | 2                               | 211,091                           | 13                                             | 2                                         |
| Pulmonary artery fibroblasts                             | 2                               | 227,546                           | 12                                             | 2                                         |
| Lymphatic microvascular endothelial cells (lung derived) | 2                               | 177,165                           | 12                                             | 1                                         |
| Marrow stromal cells                                     | 2                               | 215,304                           | 12                                             | 1                                         |
| Retinal pigment epithelial cells                         | 2                               | 269,645                           | 12                                             | 1                                         |
| Lung fibroblasts                                         | 4                               | 227,083                           | 12                                             | 4                                         |
| Skin melanocytes                                         | 4                               | 209,180                           | 12                                             | 3                                         |
| Conjunctival fibroblast                                  | 2                               | 205,636                           | 12                                             | 1                                         |
| Aortic adventitial fibroblasts                           | 2                               | 219,329                           | 11                                             | 2                                         |
| Gum tissue fibroblasts                                   | 2                               | 184,795                           | 11                                             | 2                                         |
| Brain microvascular endothelial cells                    | 2                               | 236,353                           | 11                                             | 1                                         |
| Neuronal progenitor cultured cells (H1 derived)          | 2                               | 157,683                           | 11                                             | 1                                         |
| Mammary fibroblasts                                      | 2                               | 234,590                           | 11                                             | 1                                         |
| Dermal fibroblasts                                       | 4                               | 259,883                           | 10                                             | 1                                         |
| Umbilical vein endothelial cells (HUVEC)                 | 3                               | 173,321                           | 10                                             | 3                                         |
| Fibroblasts                                              | 4                               | 242,761                           | 10                                             | 1                                         |

|                                                      |   |         |    |   |
|------------------------------------------------------|---|---------|----|---|
| Blood microvascular endothelial cells                | 6 | 186,340 | 10 | 1 |
| Renal endothelial cells                              | 2 | 180,568 | 10 | 1 |
| Heart tissue                                         | 1 | 212,644 | 9  | 1 |
| Trophoblast cultured cells (H1 derived)              | 2 | 167,747 | 9  | 1 |
| Lymphatic microvascular endothelial cells            | 2 | 195,340 | 9  | 1 |
| Dermal microvascular endothelial cells               | 4 | 177,348 | 8  | 1 |
| Blood microvascular endothelial cells (lung derived) | 2 | 207,430 | 7  | 1 |
| Pulmonary artery endothelial cells                   | 1 | 158,790 | 6  | 1 |

---

|                              |    |         |    |    |
|------------------------------|----|---------|----|----|
| Fetal thymus                 | 11 | 164,922 | 40 | 12 |
| Fetal placenta               | 6  | 252,764 | 24 | 8  |
| Fetal large intestine tissue | 15 | 214,624 | 18 | 7  |
| Fetal small intestine tissue | 13 | 215,446 | 17 | 6  |
| Fetal ovary                  | 1  | 175,291 | 17 | 4  |
| Fetal lung tissue            | 36 | 253,127 | 17 | 4  |
| Fetal spleen                 | 1  | 227,282 | 16 | 2  |
| Fetal stomach                | 14 | 216,596 | 15 | 3  |
| Fetal brain tissue           | 13 | 236,081 | 15 | 2  |
| Fetal muscle tissue          | 53 | 254,853 | 15 | 7  |
| Fetal adrenal tissue         | 7  | 216,908 | 13 | 2  |
| Fetal lung fibroblasts       | 6  | 210,975 | 11 | 2  |
| Fetal fibroblasts            | 2  | 213,347 | 11 | 1  |
| Fetal skin fibroblasts       | 16 | 227,669 | 11 | 1  |
| Fetal testes                 | 2  | 228,703 | 11 | 2  |
| Fetal spinal cord            | 5  | 247,427 | 10 | 2  |
| Fetal kidney tissue          | 29 | 261,339 | 10 | 5  |
| Fetal renal cortex           | 18 | 259,908 | 9  | 4  |
| Fetal renal pelvis           | 18 | 256,695 | 9  | 3  |
| Fetal skin                   | 1  | 220,690 | 9  | 1  |
| Fetal heart tissue           | 12 | 248,392 | 8  | 2  |

---

|           |    |         |    |   |
|-----------|----|---------|----|---|
| JURKAT    | 2  | 173,172 | 31 | 4 |
| LCL       | 8  | 156,384 | 23 | 6 |
| IPS cells | 4  | 224,668 | 23 | 7 |
| LNCAP     | 3  | 231,668 | 22 | 6 |
| PrEC      | 2  | 204,899 | 20 | 3 |
| HL60      | 2  | 188,651 | 19 | 4 |
| CACO2     | 2  | 148,361 | 19 | 3 |
| HESC      | 14 | 220,607 | 18 | 9 |
| K562      | 21 | 185,033 | 17 | 6 |
| MCF7      | 7  | 237,710 | 17 | 3 |
| LHCNM2    | 4  | 256,704 | 16 | 3 |
| IMR90     | 4  | 214,439 | 16 | 2 |
| HELA      | 3  | 170,759 | 16 | 2 |
| WERIRB    | 2  | 227,707 | 16 | 1 |
| M059J     | 2  | 271,484 | 15 | 1 |
| HCT116    | 2  | 144,663 | 14 | 1 |
| T47D      | 2  | 186,982 | 13 | 3 |
| NB4       | 2  | 175,514 | 13 | 1 |
| NT2       | 2  | 206,383 | 13 | 2 |
| HEPG2     | 3  | 148,936 | 12 | 2 |
| SKNMC     | 2  | 184,803 | 11 | 1 |
| BE2C      | 2  | 219,746 | 10 | 1 |
| A549      | 3  | 162,737 | 10 | 2 |
| HEK293T   | 2  | 88,226  | 7  | 2 |
| PANC1     | 2  | 151,069 | 7  | 1 |
| RPMI7951  | 2  | 210,248 | 7  | 1 |
| SKNSH     | 2  | 133,079 | 5  | 1 |
| CMK       | 1  | 167,379 | 4  | 1 |

\* Data sets were excluded from downstream analysis (see **Methods**).

\*\* *PTPN2* locus (extended to 140 kb): chr18: 12,760,001 - 12,900,000 (hg19).

Unedited and uncropped Gels and Blots

Full unedited blot for Figure 13A

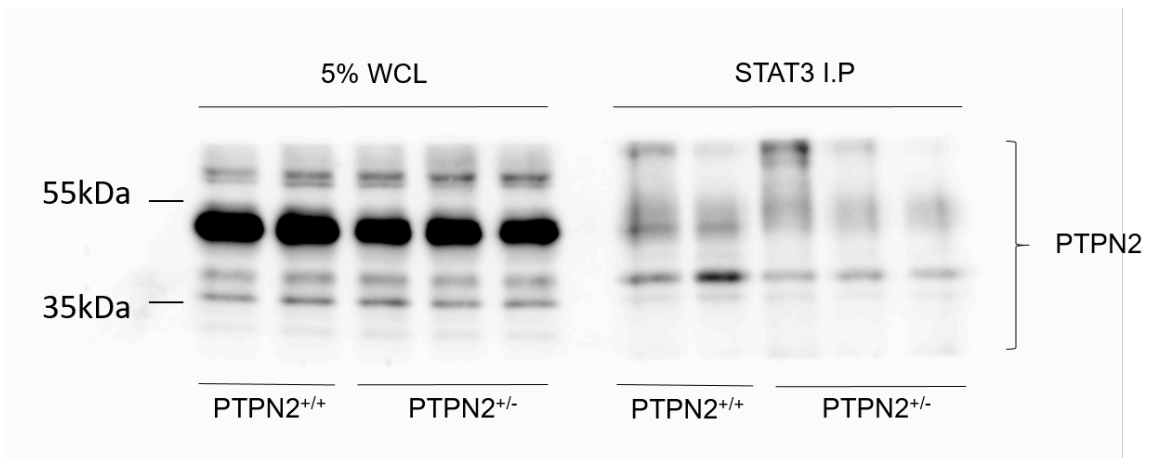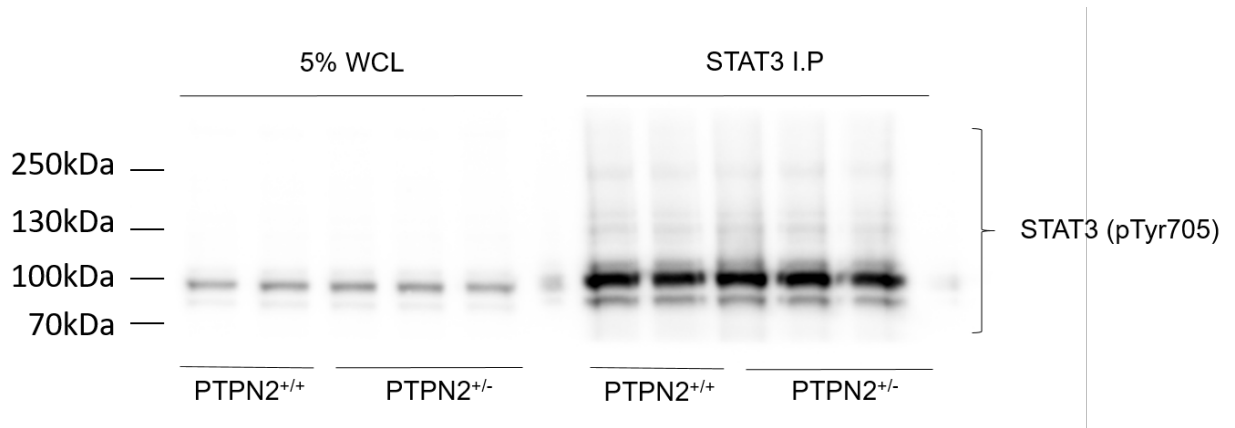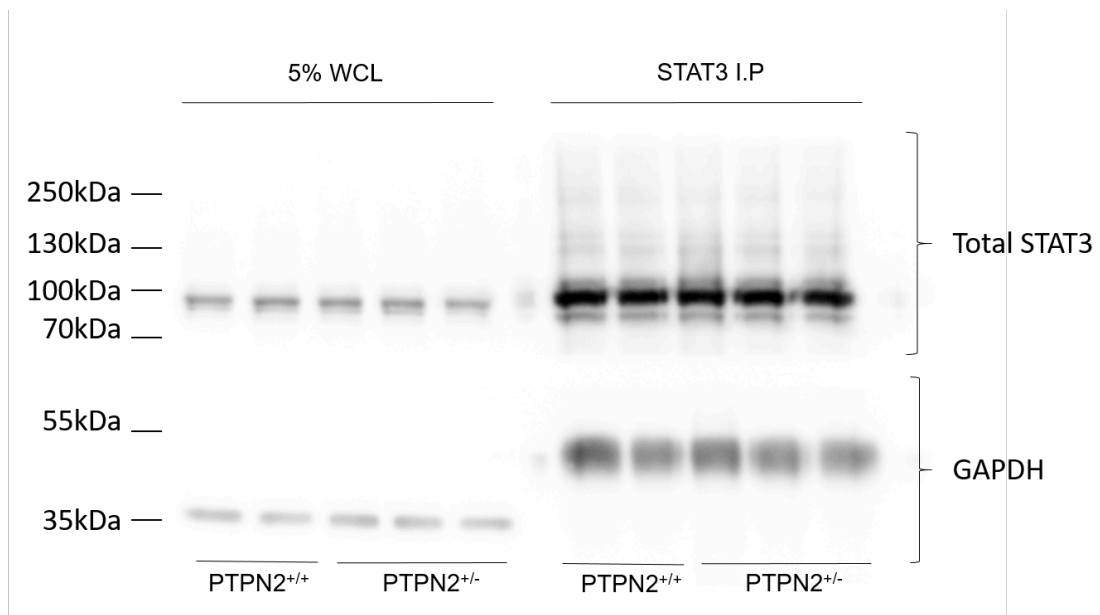

**Full unedited blot for Figure 13B**

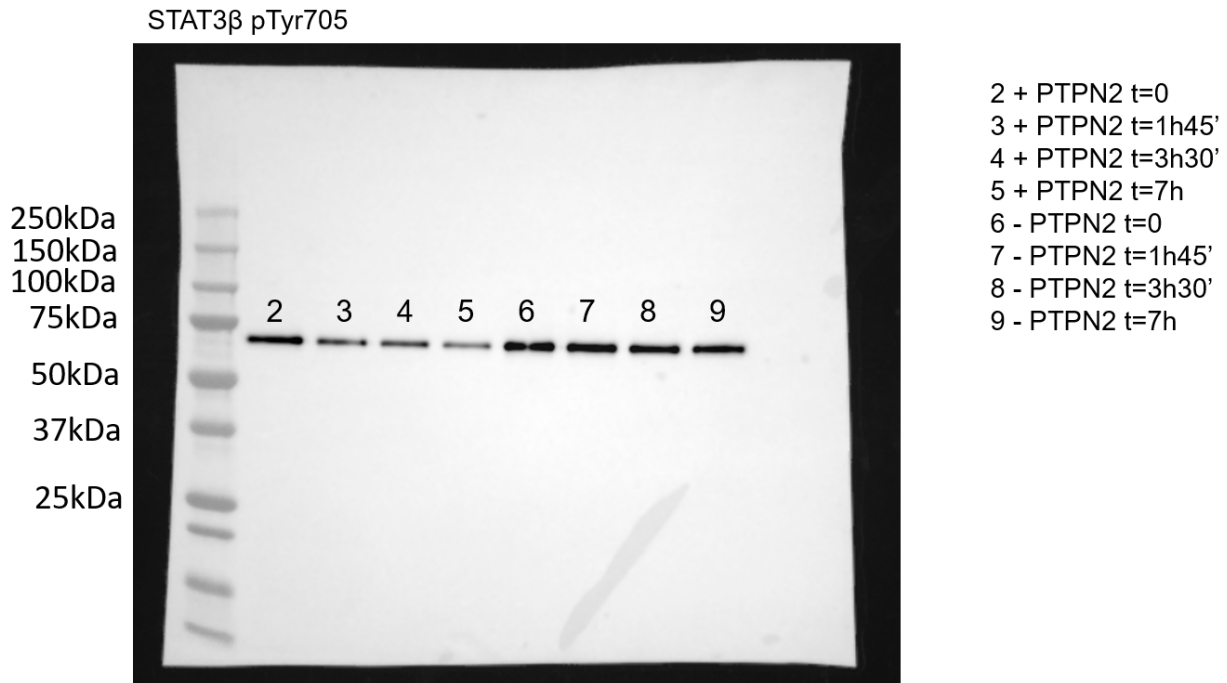

**Full unedited gel for Figure 13C**

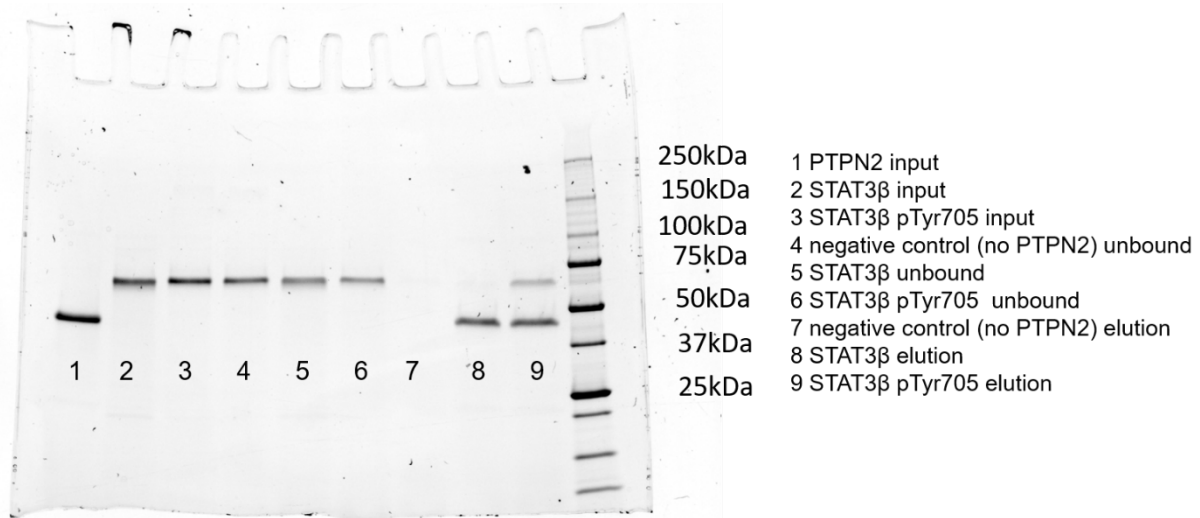

Supplement: sd1 [file 1]
